# Supplementary material for: Site-selective halogenation on meso-mesityl substituents of 10,20-dimesityl-5,15-diazaporphyrins with an AuX3/AgOTf combination
Source: Royal Society of Chemistry journal article supplement (doi:10.1039/d0dt02727h), 2020-01-01
Supplement: d0dt02727h1.pdf [file d0dt02727h1.pdf]

# Supporting Information

## Site-Selective Halogenation on *meso*-Mesityl Substituents of 10,20-Dimesityl-5,15- Diazaporphyrins with An AuX<sub>3</sub>/AgOTf Combination

Jean-François Longevial, Kazuya Miyagawa, and Hiroshi  
Shinokubo\*

*Department of Molecular and Macromolecular Chemistry, Graduate School of Engineering,  
Nagoya University, Chikusa-ku, Nagoya, Aichi 464-8603, Japan.*

E-mail: hshino@chembio.nagoya-u.ac.jp

### Table of Contents

|                                                              |     |
|--------------------------------------------------------------|-----|
| Instrumentation and Materials .....                          | S2  |
| Synthetic Procedure and Characterizations of Compounds ..... | S3  |
| NMR, MS, and UV-Vis Spectra of Compounds .....               | S12 |
| X-ray Diffraction Analysis .....                             | S48 |
| Electrochemical Analysis .....                               | S49 |
| Theoretical Calculations .....                               | S51 |
| References .....                                             | S52 |

## Instrumentation and Materials

$^1\text{H}$  NMR (500 MHz),  $^{13}\text{C}$  NMR (126 MHz), and  $^{19}\text{F}$  NMR (470 MHz) spectra were recorded on a Bruker AVANCE III HD spectrometer. Chemical shifts were reported as the delta scale in ppm relative to  $\text{CDCl}_3$  ( $\delta = 7.26$  ppm) for  $^1\text{H}$  NMR,  $\text{CDCl}_3$  ( $\delta = 77.16$  ppm) for  $^{13}\text{C}$  NMR, and hexafluorobenzene ( $\delta = -162.9$  ppm) for  $^{19}\text{F}$  NMR. UV/vis absorption spectra were recorded on a Shimadzu UV-2550 spectrometer. Emission spectra were recorded using a JASCO FP-6500 spectrometer, and absolute fluorescence quantum yields were measured by the photon-counting method using an integration sphere. High-resolution electrospray ionization time-of-flight (APCI-TOF) mass spectra were taken on a Bruker micrOTOF instrument. The progress of the reaction was monitored by MALDI-TOF-MS analysis on a Bruker autoflex TOF. 10,20-Dimesityl-5,15-diazaporphyrin **1H** and its nickel(II) complex **1Ni** were synthesized according to the literature.<sup>1</sup> Unless otherwise noted, materials obtained from commercial suppliers were used without further purification.

## Synthetic Procedure and Characterization of Compounds

**Chlorination on the mesityl groups of diazaporphyrins 1H.** A grinded powder of gold(III) trichloride (80 mg, 0.18 mmol, 1 equiv) and silver(I) triflate (280 mg, 1.1 mmol, 6 equiv) was added to a solution of 10,20-dimesityl-5,15-diazaporphyrin **1H** (100 mg, 0.18 mmol) in dichloroethane (12 mL). The color of the solution changed from purple to deep blue. The resulting mixture was heated to 85 °C. After stirring for 1 h, gold(III) trichloride (160 mg, 0.36 mmol, 2 equiv) was added. Again, another portion of gold(III) trichloride (160 mg, 0.36 mmol, 2 equiv) was added after 1 h. Then, a saturated solution of NaHCO<sub>3</sub> (12 mL) was added and the mixture was stirred for 15 min. Then, the organic layer was washed with water (3 × 10 mL), dried over Na<sub>2</sub>SO<sub>4</sub>, and evaporated to dryness. The crude product was purified by silica gel column chromatography (CH<sub>2</sub>Cl<sub>2</sub> as an eluent) to afford 10-(3-chloro-2,4,6-trimethylphenyl)-20-mesityl-5,15-diazaporphyrin **2H-Cl** in 12 % yield (12.6 mg) and 10,20-di(3-chloro-2,4,6-trimethylphenyl)-5,15-diazaporphyrin **3H-Cl** in 40% yield (45 mg), respectively.

**Bromination on the mesityl groups of diazaporphyrins 1H.** A grinded powder of gold(III) tribromide (238 mg, 0.55 mmol, 3 equiv) and silver(I) triflate (280 mg, 1.1 mmol, 6 equiv) was added to a solution of 10,20-dimesityl-5,15-diazaporphyrin **1H** (100 mg, 0.18 mmol) in dichloroethane (12 mL). The color of the solution changed from purple to deep blue. The resulting mixture was heated to 85 °C for 3 h. Afterwards, a saturated solution of

NaHCO<sub>3</sub> (12 mL) was added and the mixture was stirred for 15 min. Then, the organic layer was washed with water (3 × 10 mL), dried over Na<sub>2</sub>SO<sub>4</sub>, and evaporated to dryness. The crude product was purified by silica gel column chromatography (CH<sub>2</sub>Cl<sub>2</sub> as an eluent) to afford 10-(3-bromo-2,4,6-trimethylphenyl)-20-mesityl-5,15-diazaporphyrin **2H-Br** in 7 % yield (8 mg) and 10,20-di(3-bromo-2,4,6-trimethylphenyl)-5,15-diazaporphyrin **3H-Br** in 60% yield (77 mg), respectively.

**10-(3-Chloro-2,4,6-trimethylphenyl)-20-mesityl-5,15-diazaporphyrin 2H-Cl.** <sup>1</sup>H NMR (500 MHz, CDCl<sub>3</sub>, 298 K): δ 9.28 (d, 2H, <sup>3</sup>J<sub>H-H</sub> = 5.0 Hz, H<sub>β-pyrr</sub>), 9.27 (d, 2H, <sup>3</sup>J<sub>H-H</sub> = 5.0 Hz, H<sub>β-pyrr</sub>), 8.87 (d, 2H, <sup>3</sup>J<sub>H-H</sub> = 5.0 Hz, H<sub>β-pyrr</sub>), 8.83 (d, 2H, <sup>3</sup>J<sub>H-H</sub> = 5.0 Hz, H<sub>β-pyrr</sub>), 7.39 (s, 1H, H<sub>Ar-meso</sub>), 7.31 (s, 2H, H<sub>Ar-meso</sub>), 2.72 (s, 3H, H<sub>p-Me</sub>), 2.64 (s, 3H, H<sub>p-Me</sub>), 1.95 (s, 3H, H<sub>o-Me</sub>), 1.85 (s, 6H, H<sub>o-Me</sub>), 1.80 (s, 3H, H<sub>o-Me</sub>), -2.56 (bs, 2H, H<sub>NH</sub>) ppm. <sup>13</sup>C NMR (125 MHz, CDCl<sub>3</sub>, 298 K): δ 139.4, 139.4, 138.8, 137.8, 137.6, 137.2, 135.6, 133.4, 133.0, 132.8, 129.6, 128.3, 121.5, 120.6, 21.9, 21.6, 21.4, 20.1 ppm. MS (APCI-TOF): calcd for [M+H]<sup>+</sup> C<sub>36</sub>H<sub>32</sub>ClN<sub>6</sub>: 583.2371. Found *m/z* = 583.2387. UV-Vis (CH<sub>2</sub>Cl<sub>2</sub>) λ<sub>max</sub> (ε): 393 (100120), 485 (3340), 508 (5560), 543 (24100), 579 (6720), 628 (32900).

**10,20-Di(3-chloro-2,4,6-trimethylphenyl)-5,15-diazaporphyrin 3H-Cl.** <sup>1</sup>H NMR (500 MHz, CDCl<sub>3</sub>, 298 K): δ 9.29 (d, 4H, <sup>3</sup>J<sub>H-H</sub> = 5.0 Hz, H<sub>β-pyrr</sub>), 8.84 (d, 4H, <sup>3</sup>J<sub>H-H</sub> = 5.0 Hz, H<sub>β-pyrr</sub>), 7.40 (s, 2H, H<sub>Ar-meso</sub>), 2.72 (s, 6H, H<sub>p-Me</sub>), 1.95 (s, 6H, H<sub>o-Me</sub>), 1.80 (s, 6H, H<sub>o-Me</sub>), -2.56 (bs, 2H, H<sub>NH</sub>) ppm. <sup>13</sup>C NMR (125 MHz, CDCl<sub>3</sub>, 298 K): δ 137.8, 137.5, 137.2, 133.6, 132.8,

132.7, 132.2, 129.6, 120.7, 21.6, 21.4, 20.1 ppm. MS (APCI-TOF): calcd for  $[M+H]^+$   $C_{36}H_{31}Cl_2N_6$ : 617.1981. Found  $m/z = 617.1968$ . UV-Vis ( $CH_2Cl_2$ )  $\lambda_{max}$  ( $\epsilon$ ): 393 (88860), 485 (2980), 508 (4830), 543 (21550), 578 (5150), 628 (29760). Fluorescence ( $CH_2Cl_2$ ,  $\lambda_{ex} = 550$  nm):  $\lambda_{em} = 635.5$  and  $695.2$  nm,  $\Phi_f = 0.009$ .

**10-(3-Bromo-2,4,6-trimethylphenyl)-20-mesityl-5,15-diazaporphyrin 2H-Br.**  $^1H$  NMR (500 MHz,  $CDCl_3$ , 298 K):  $\delta$  9.28 (d, 2H,  $^3J_{H-H} = 5.0$  Hz,  $H_{\beta-pyrr}$ ), 9.27 (d, 2H,  $^3J_{H-H} = 5.0$  Hz,  $H_{\beta-pyrr}$ ), 8.87 (d, 2H,  $^3J_{H-H} = 5.0$  Hz,  $H_{\beta-pyrr}$ ), 8.83 (d, 2H,  $^3J_{H-H} = 5.0$  Hz,  $H_{\beta-pyrr}$ ), 7.40 (s, 1H,  $H_{Ar-meso}$ ), 7.32 (s, 2H,  $H_{Ar-meso}$ ), 2.76 (s, 3H,  $H_{p-Me}$ ), 2.64 (s, 3H,  $H_{p-Me}$ ), 2.00 (s, 3H,  $H_{o-Me}$ ), 1.85 (s, 6H,  $H_{o-Me}$ ), 1.78 (s, 3H,  $H_{o-Me}$ ), -2.56 (bs, 2H,  $H_{NH}$ ) ppm.  $^{13}C$  NMR (125 MHz,  $CDCl_3$ , 298 K):  $\delta$  154.1, 148.1, 139.6, 139.4, 139.4, 139.3, 138.8, 138.5, 137.5, 135.6, 133.4, 133.0, 132.6, 131.0, 129.5, 129.0, 128.3, 125.8, 121.5, 120.8, 24.6, 23.4, 21.9, 21.6, 21.6 ppm. APCI-TOF-MS: calcd for  $[M+H]^+$   $C_{36}H_{32}BrN_6$ : 627.1866. Found  $m/z = 627.1874$ . UV-Vis ( $CH_2Cl_2$ )  $\lambda_{max}$  ( $\epsilon$ ) 394 (109230), 486 (3700), 508 (6030), 543 (26070), 578 (6240), 628 (35900).

**10,20-Di(3-bromo-2,4,6-trimethylphenyl)-5,15-diazaporphyrin 3H-Br.**  $^1H$  NMR (500 MHz,  $CDCl_3$ , 298 K):  $\delta$  9.29 (d, 4H,  $^3J_{H-H} = 5.0$  Hz,  $H_{\beta-pyrr}$ ), 8.84 (d, 4H,  $^3J_{H-H} = 5.0$  Hz,  $H_{\beta-pyrr}$ ), 7.40 (s, 2H,  $H_{Ar-meso}$ ), 2.76 (s, 6H,  $H_{p-Me}$ ), 2.00 (s, 6H,  $H_{o-Me}$ ), 1.78 (s, 6H,  $H_{o-Me}$ ), -2.56 (bs, 2H,  $H_{NH}$ ) ppm.  $^{13}C$  NMR (125 MHz,  $CDCl_3$ , 298 K):  $\delta$  154.3, 148.3, 139.6, 139.6, 139.3, 138.5, 138.5, 137.4, 133.6, 133.6, 132.7, 132.7, 129.5, 125.8, 120.9, 24.6, 23.5, 21.7

ppm. APCI-TOF-MS: calcd for  $[M+H]^+$   $C_{36}H_{31}Br_2N_6$ : 705.0971. Found  $m/z = 705.0974$ . UV-Vis ( $CH_2Cl_2$ )  $\lambda_{max}$  ( $\epsilon$ ): 394 (103304), 486 (3420), 508 (5670), 543 (25100), 578 (5800), 628 (34750). Fluorescence ( $CH_2Cl_2$ ,  $\lambda_{ex} = 550$  nm):  $\lambda_{em} = 636.4$  and  $695.7$  nm,  $\Phi_f = 0.008$ .

**Bromination on the core of 10,20-diphenyl-5,15-diazaporphyrin 4.** A grinded powder of gold(III) tribromide (52.5 mg, 0.12 mmol, 3 equiv) and silver(I) triflate (61.6 mg, 0.24 mmol, 6 equiv) was added to a solution of 10,20-diphenyl-5,15-diazaporphyrin **4** (18.6 mg, 0.04 mmol) in dichloroethane (3.0 mL). The color of the solution changed from purple to deep blue. The resulting mixture was heated to 85 °C for 3 h. Afterwards, a saturated solution of  $NaHCO_3$  (12 mL) was added and the mixture was stirred for 15 min. Then, the organic layer was washed with water ( $3 \times 10$  mL), dried over  $Na_2SO_4$ , and evaporated to dryness. The crude product was purified by silica gel column chromatography ( $CH_2Cl_2$  as an eluent) to afford 2-bromo-10,20-diphenyl-5,15-diazaporphyrin **5** in 9 % yield (2.0 mg).

**3-Bromo-10,20-diphenyl-5,15-diazaporphyrin 5.**  $^1H$  NMR (500 MHz,  $CDCl_3$ , 298 K):  $\delta$  9.38 (d, 1H,  $^3J_{H-H} = 4.5$  Hz,  $H_{\beta-pyrr}$ ), 9.30 (d, 1H,  $^3J_{H-H} = 5.0$  Hz,  $H_{\beta-pyrr}$ ), 9.09 (d, 1H,  $^3J_{H-H} = 4.0$  Hz,  $H_{\beta-pyrr}$ ), 9.05 (d, 1H,  $^3J_{H-H} = 4.5$  Hz,  $H_{\beta-pyrr}$ ), 9.02 (d, 1H,  $^3J_{H-H} = 4.5$  Hz,  $H_{\beta-pyrr}$ ), 8.91 (s, 1H,  $H_{\beta-pyrr}$ ), 8.82 (d, 1H,  $^3J_{H-H} = 4.5$  Hz,  $H_{\beta-pyrr}$ ), 8.18–8.22 (m, 4H,  $H_{Ph}$ ), 7.82–7.86 (m, 6H,  $H_{Ph}$ ), –3.30 (bs, 2H,  $H_{NH}$ ) ppm.  $^{13}C$  NMR (125 MHz,  $CDCl_3$ , 298 K):  $\delta$  139.2, 139.1, 136.2, 135.5, 135.4, 135.0, 134.8, 131.7, 131.6, 130.9, 130.2, 128.7, 128.6, 127.5,

127.4, 126.5, 122.7, 122.5 ppm. APCI-TOF-MS: calcd for  $[M]^+$  C<sub>30</sub>H<sub>19</sub>BrN<sub>6</sub>: 542.0849.

Found  $m/z$  = 542.0834.

**Suzuki–Miyaura coupling on the aryl substituents.** In a narrow Schlenk tube, 10,20-di(3-bromo-2,4,6-trimethylphenyl)-5,15-diazaporphyrin **3H-Br** (5.2 mg, 7.36  $\mu$ mol) was charged. Then phenylboronic acid (3.6 mg, 29.5  $\mu$ mol, 4 equiv), K<sub>3</sub>PO<sub>4</sub> (12.5 mg, 58.8  $\mu$ mol, 8 equiv), Pd<sub>2</sub>(dba)<sub>3</sub>•CHCl<sub>3</sub> (1 mg, 0.74  $\mu$ mol, 10 mol%), and SPhos (1 mg, 1.47  $\mu$ mol) were added, and the Schlenk tube was capped with a septum and sealed with electrical tape. The Schlenk tube was evacuated and back filled with nitrogen 3 times. Then, distilled toluene (1 mL) was added and the resulting mixture was stirred at 100 °C for 2 h and additional 12 h at 60 °C. The progress of the reaction was monitored by MALDI-TOF-MS analysis of the reaction mixture. The mixture was then cooled to room temperature, and CH<sub>2</sub>Cl<sub>2</sub> (5 mL) and water (5 mL) were added. The organic layer was then washed two times with 1 M NaOH aqueous solution, dried over anhydrous Na<sub>2</sub>SO<sub>4</sub>, and evaporated to dryness. Finally, the residue was purified by silica-gel column chromatography (CH<sub>2</sub>Cl<sub>2</sub>/AcOEt = 20/1) to provide 10,20-di(3-phenyl-2,4,6-trimethylphenyl)-5,15-diazaporphyrin **8a** as a purple solid in 95% yield.

**10-(3-Phenyl-2,4,6-trimethylphenyl)-20-mesityl-5,15-diazaporphyrin 7.** <sup>1</sup>H NMR (500 MHz, CDCl<sub>3</sub>, 298 K):  $\delta$  9.30 (d, 2H, <sup>3</sup>J<sub>H-H</sub> = 5.0 Hz, H <sub>$\beta$ -pyrr</sub>), 9.27 (d, 2H, <sup>3</sup>J<sub>H-H</sub> = 5.0 Hz,

$H_{\beta\text{-pyrr}}$ ), 8.96 (d, 2H,  $^3J_{\text{H-H}} = 5.0$  Hz,  $H_{\beta\text{-pyrr}}$ ), 8.86 (d, 2H,  $^3J_{\text{H-H}} = 5.0$  Hz,  $H_{\beta\text{-pyrr}}$ ), 7.51–7.35 (m, 5H,  $H_{\text{Ph}}$ ), 7.31, (bs, 3H,  $H_{\text{Ar-meso}}$ ), 2.64 (s, 3H,  $H_{\text{Me}}$ ), 2.35 (s, 3H,  $H_{\text{Me}}$ ), 1.87–1.83 (m, 9H,  $H_{\text{Me}}$ ), 1.54 (s, 3H,  $H_{\text{Me}}$ ), –2.53 (bs, 2H,  $H_{\text{NH}}$ ) ppm.  $^{13}\text{C}$  NMR (125 MHz,  $\text{CDCl}_3$ , 298 K):  $\delta$  154.0, 147.9, 141.4, 139.9, 139.4, 139.4, 138.7, 138.4, 137.6, 136.9, 136.3, 135.7, 133.2, 132.9, 129.7, 128.7, 128.2, 126.9, 121.8, 121.3, 21.9, 21.9, 21.8, 21.6 ppm. APCI-TOF-MS: calcd for  $[\text{M}+\text{H}]^+$   $\text{C}_{42}\text{H}_{37}\text{N}_6$ : 625.3074. Found  $m/z = 625.3091$ . UV-Vis ( $\text{CH}_2\text{Cl}_2$ )  $\lambda_{\text{max}}$  ( $\epsilon$ ): 395 (81830), 485 (2730), 508 (4470), 543 (19230), 578 (4620), 629 (26030).

**10,20-Di(3-phenyl-2,4,6-trimethylphenyl)-5,15-diazaporphyrin 8a.**  $^1\text{H}$  NMR (500 MHz,  $\text{CDCl}_3$ , 298 K):  $\delta$  9.30 (d, 4H,  $^3J_{\text{H-H}} = 5.0$  Hz,  $H_{\beta\text{-pyrr}}$ ), 8.96 (d, 4H,  $^3J_{\text{H-H}} = 5.0$  Hz,  $H_{\beta\text{-pyrr}}$ ), 7.51–7.34 (m, 12H,  $H_{\text{Ph}}$  and  $H_{\text{Ar-meso}}$ ), 2.35 (s, 6H,  $H_{\text{Me}}$ ), 1.88 (s, 3H,  $H_{\text{Me}}$ ), 1.85 (s, 3H,  $H_{\text{Me}}$ ), 1.56 (s, 3H,  $H_{\text{Me}}$ ), 1.53 (s, 3H,  $H_{\text{Me}}$ ), –2.52 (bs, 2H,  $H_{\text{NH}}$ ) ppm.  $^{13}\text{C}$  NMR (125 MHz,  $\text{CDCl}_3$ , 298 K):  $\delta$  154.2, 148.3, 141.4, 139.9, 138.4, 138.4, 137.6, 137.5, 136.9, 136.3, 133.3, 132.9, 129.7, 128.7, 126.9, 121.8, 21.9, 21.9, 21.4, 20.5, 20.4 ppm. APCI-TOF-MS: calcd for  $[\text{M}+\text{H}]^+$   $\text{C}_{48}\text{H}_{41}\text{N}_6$ : 701.3387. Found  $m/z = 701.3352$ . UV-Vis ( $\text{CH}_2\text{Cl}_2$ )  $\lambda_{\text{max}}$  ( $\epsilon$ ): 395 (81900), 486 (2680), 508 (4430), 544 (19560), 578 (4640), 629 (26830). Fluorescence ( $\text{CH}_2\text{Cl}_2$ ,  $\lambda_{\text{ex}} = 550$  nm):  $\lambda_{\text{em}} = 636.9$  and 696.1 nm,  $\Phi_{\text{f}} = 0.04$ .

**10,20-Di(2,4,6-trimethyl-3-(1-naphthyl)phenyl)-5,15-diazaporphyrin 8b.**  $^1\text{H}$  NMR (500 MHz,  $\text{CDCl}_3$ , 298 K):  $\delta$  9.34 (d, 2H,  $^3J_{\text{H-H}} = 5.0$  Hz,  $H_{\beta\text{-pyrr}}$ ), 9.31 (d, 2H,  $^3J_{\text{H-H}} = 5.0$  Hz,



H $_{\beta}$ -pyrr), 9.03 (d, 2H,  $^3J_{H-H} = 5.0$  Hz, H $_{\beta}$ -pyrr), 9.02 (d, 2H,  $^3J_{H-H} = 5.0$  Hz, H $_{\beta}$ -pyrr), 7.96–7.41 (m, 16H, H $_{Naphthalene}$ ; H $_{Ar-meso}$ ), 2.23 (s, 6H, H $_{Me}$ ), 1.92 (2s, 6H, H $_{Me}$ ), 1.44 (2s, 6H, H $_{Me}$ ), –2.52 (bs, 2H, H $_{NH}$ ) ppm.  $^{13}C$  NMR (125 MHz, CDCl $_3$ , 298 K):  $\delta$  154.5, 148.0, 143.5, 138.8, 138.8, 138.6, 138.5, 138.1, 137.6, 136.4, 134.1, 133.3, 132.9, 132.3, 132.3, 131.0, 129.1, 129.0, 128.9, 128.7, 128.5, 127.6, 127.3, 126.6, 126.1, 126.0, 125.4, 125.4, 121.7, 22.0, 22.0, 21.9, 20.9, 20.9 ppm. APCI-TOF-MS: calcd for [M+H] $^+$  C $_{56}$ H $_{45}$ N $_6$ : 801.3700. Found  $m/z$  = 801.3669. UV-Vis (CH $_2$ Cl $_2$ )  $\lambda_{max}$  ( $\epsilon$ ): 284 (20500), 294 (19800), 396 (92760), 486 (3000), 508 (4900), 544 (22000), 578 (5200), 629 (30400). Fluorescence (CH $_2$ Cl $_2$ ,  $\lambda_{ex} = 550$  nm):  $\lambda_{em} = 636.5$  and 696.1 nm,  $\Phi_f = 0.03$ .

**10,20-Di(3-(4-trifluoromethyl)phenyl)-2,4,6-trimethylphenyl)-5,15-diazaporphyrin**

**8c.**  $^1H$  NMR (500 MHz, CDCl $_3$ , 298 K):  $\delta$  9.24 (d, 4H,  $^3J_{H-H} = 5.0$  Hz, H $_{\beta}$ -pyrr), 9.87 (d, 4H,  $^3J_{H-H} = 5.0$  Hz, H $_{\beta}$ -pyrr), 7.70–7.68 (m, 4H, H $_{Ph}$ ), 7.51–7.49 (m, 4H, H $_{Ph}$ ), 7.37, (s, 2H, H $_{Ar-meso}$ ), 2.26 (s, 6H, H $_{Me}$ ), 1.81 (2s, 6H, H $_{Me}$ ), 1.44 (2s, 6H, H $_{Me}$ ), –2.60 (bs, 2H, H $_{NH}$ ) ppm.  $^{19}F$  NMR (470 MHz, CDCl $_3$ , 298 K):  $\delta$  –62.38 (s, CF $_3$ ) ppm.  $^{13}C$  NMR (125 MHz, CDCl $_3$ , 298K): 154.1, 148.3, 145.2, 139.1, 138.6, 137.2, 137.2, 136.7, 136.6, 133.4, 132.8, 130.2, 129.4 (q,  $J = 32.4$  MHz), 129.0, 125.8, 124.4 (q,  $J = 272.7$  MHz), 121.4, 21.9, 21.9, 21.4, 20.4, 20.4 ppm. APCI-TOF-MS: calcd for [M+H] $^+$  C $_{50}$ H $_{39}$ F $_6$ N $_6$ : 837.3134. Found  $m/z$  = 837.3106. UV-Vis (CH $_2$ Cl $_2$ )  $\lambda_{max}$  ( $\epsilon$ ): 395 (94676), 486 (3000), 508 (5040), 543 (22480), 578 (5210), 629 (30730). Fluorescence (CH $_2$ Cl $_2$ ,  $\lambda_{ex} = 550$  nm):  $\lambda_{em} = 634.9$  and 695.7 nm,  $\Phi_f =$

0.05.

**10,20-Di(3-(4-methoxy)phenyl-2,4,6-trimethylphenyl)-5,15-diazaporphyrin 8d.** <sup>1</sup>H

NMR (500 MHz, CDCl<sub>3</sub>, 298 K):  $\delta$  9.30 (d, 4H, <sup>3</sup>J<sub>H-H</sub> = 5.0 Hz, H <sub>$\beta$ -pyrr</sub>), 8.95 (d, 4H, <sup>3</sup>J<sub>H-H</sub> = 5.0 Hz, H <sub>$\beta$ -pyrr</sub>), 7.41 (s, 1H, H<sub>Ar-meso</sub>), 7.40 (s, 1H, H<sub>Ar-meso</sub>), 7.35–7.33 (m, 4H, H<sub>Ph</sub>), 7.05–7.02 (m, 4H, H<sub>Ph</sub>), 3.86 (2s, 6H, H<sub>OMe</sub>), 2.36 (s, 6H, H<sub>Me</sub>), 1.88 (2s, 6H, H<sub>Me</sub>), 1.56 (2s, 6H, H<sub>Me</sub>), –2.52 (bs, 2H, H<sub>NH</sub>) ppm. <sup>13</sup>C NMR (125 MHz, CDCl<sub>3</sub>, 298 K):  $\delta$  158.4, 153.9, 148.2, 139.4, 138.1, 138.1, 137.9, 137.9, 136.1, 133.4, 133.1, 132.8, 130.6, 128.5, 121.8, 114.0, 21.7, 21.7, 21.4, 20.4, 20.4 ppm. APCI-TOF-MS: calcd for [M+H]<sup>+</sup> C<sub>50</sub>H<sub>45</sub>N<sub>6</sub>O<sub>2</sub>: 761.3598. Found  $m/z$  = 761.3562. UV-Vis (CH<sub>2</sub>Cl<sub>2</sub>)  $\lambda_{\max}$  ( $\epsilon$ ): 284 (20500), 294 (19800), 396 (92760), 486 (3000), 508(4900), 544 (22000), 578 (5200), 629 (30400). Fluorescence (CH<sub>2</sub>Cl<sub>2</sub>,  $\lambda_{\text{ex}}$  = 550 nm):  $\lambda_{\text{em}}$  = 637.1 and 696.3 nm,  $\Phi_{\text{f}}$  = 0.03.

**Synthesis of gold complexes 9 and 10.** To a solution of **1H** (8 mg, 14.5  $\mu$ mol, 1 equiv) in dichloroethane (12 mL) at room temperature under open air, gold(III) trichloride (10 mg, 44  $\mu$ mol, 3 equiv) was added. The color of the solution changed from purple to deep blue within a few seconds. Afterwards, the reaction mixture was stirred at 85 °C for 3 h. Then, the solvent was removed under reduced pressure and the crude product was directly purified by silica gel column chromatography (CH<sub>2</sub>Cl<sub>2</sub>). The less polar green product (first fraction) consisted of bisgold complex **10** (25% yield). The second fraction (grey color) consisted of

the monogold complex **9** (32% yield).

**Gold Complex 9.**  $^1\text{H}$  NMR (500 MHz,  $\text{CDCl}_3$ , 298 K):  $\delta$  9.79 (d, 2H,  $^3J_{\text{H-H}} = 5.0$  Hz,  $\text{H}_{\beta\text{-pyrr}}$ ), 9.26 (d, 2H,  $^3J_{\text{H-H}} = 5.0$  Hz,  $\text{H}_{\beta\text{-pyrr}}$ ), 8.93 (d, 2H,  $^3J_{\text{H-H}} = 5.0$  Hz,  $\text{H}_{\beta\text{-pyrr}}$ ), 8.78 (d, 2H,  $^3J_{\text{H-H}} = 5.0$  Hz,  $\text{H}_{\beta\text{-pyrr}}$ ), 7.33 (s, 4H,  $\text{H}_{\text{Ar-meso}}$ ), 2.65 (s, 6H,  $\text{H}_{p\text{-Me}}$ ), 1.84 (s, 12H,  $\text{H}_{o\text{-Me}}$ ), -1.92 (bs, 2H,  $\text{H}_{\text{NH}}$ ) ppm.  $^{13}\text{C}$  NMR (125 MHz,  $\text{CDCl}_3$ , 298 K): 139.7, 139.1, 137.4, 136.2, 135.2, 135.1, 134.4, 137.7, 131.0, 129.9, 128.6, 126.7, 125.6, 21.9, 21.6 ppm. MALDI-TOF-MS: calcd for  $[\text{M}+\text{H}]^+$   $\text{C}_{36}\text{H}_{33}\text{AuCl}_3\text{N}_6$ : 851.1420. Found  $m/z = 851.150$ . UV-Vis ( $\text{CH}_2\text{Cl}_2$ )  $\lambda_{\text{max}}$  ( $\epsilon$ ): 390 (80260), 566 (12960), 592 (8650), 641 (40810).

**Gold Complex 10.**  $^1\text{H}$  NMR (500 MHz,  $\text{CDCl}_3$ , 298 K):  $\delta$  9.86 (d, 4H,  $^3J_{\text{H-H}} = 5.0$  Hz,  $\text{H}_{\beta\text{-pyrr}}$ ), 8.92 (d, 4H,  $^3J_{\text{H-H}} = 5.0$  Hz,  $\text{H}_{\beta\text{-pyrr}}$ ), 7.37 (s, 4H,  $\text{H}_{\text{Ar-meso}}$ ), 2.66 (s, 6H,  $\text{H}_{p\text{-Me}}$ ), 1.85 (s, 12H,  $\text{H}_{o\text{-Me}}$ ), -1.67 (bs, 2H,  $\text{H}_{\text{NH}}$ ) ppm.  $^{13}\text{C}$  NMR (125 MHz,  $\text{CDCl}_3$ , 298 K): 140.8, 139.0, 136.2, 133.5 (2C), 133.3, 130.0, 129.0, 128.6, 22.1, 21.7 ppm. MALDI-TOF-MS: calcd for  $[\text{M}+\text{H}]^+$   $\text{C}_{36}\text{H}_{32}\text{Au}_2\text{Cl}_6\text{N}_6$ : 1153.0151. Found  $m/z = 1153.014$ . UV-Vis ( $\text{CH}_2\text{Cl}_2$ )  $\lambda_{\text{max}}$  ( $\epsilon$ ): 390 (116890), 581 (18950), 608 (11200), 660 (40800).

## NMR, MS, and UV-Vis Spectra of Compounds

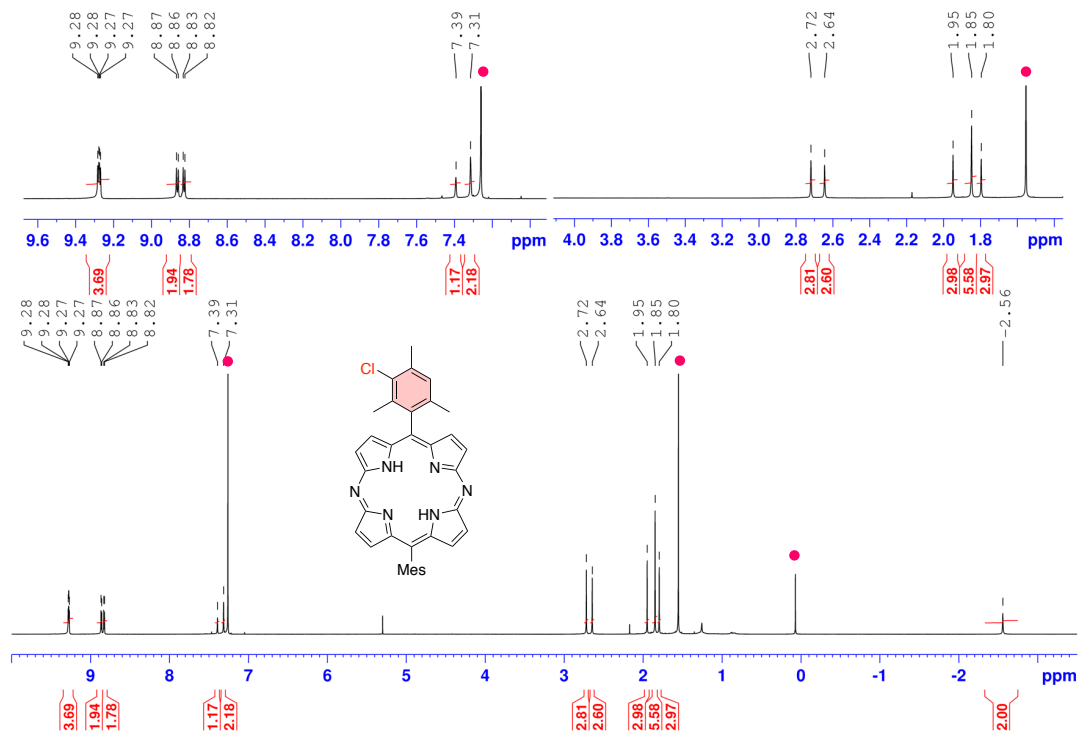

**Figure S1.**  $^1\text{H}$  NMR spectrum of **2H-Cl** in  $\text{CDCl}_3$ .

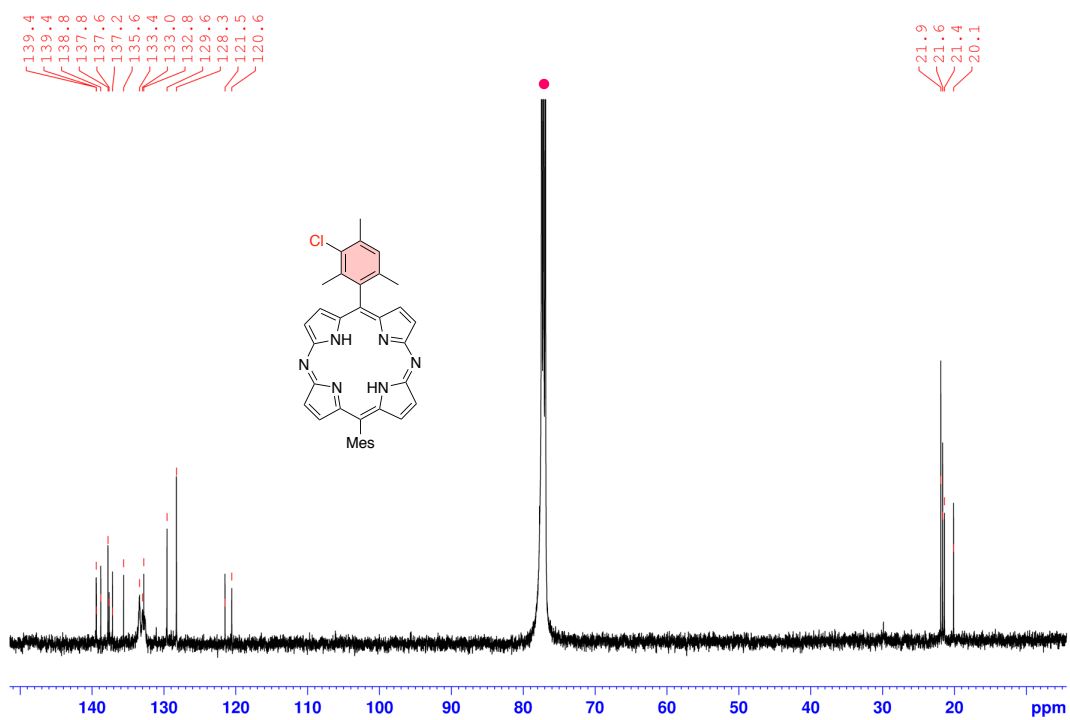

**Figure S2.**  $^{13}\text{C}\{^1\text{H}\}$  NMR spectrum of **2H-Cl** in  $\text{CDCl}_3$ .

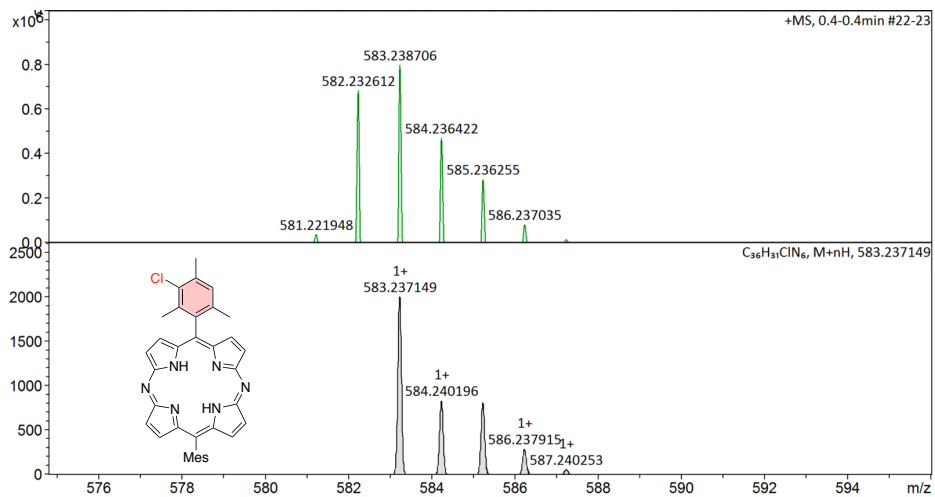

Figure S3. HR-MS spectrum of 2H-Cl.

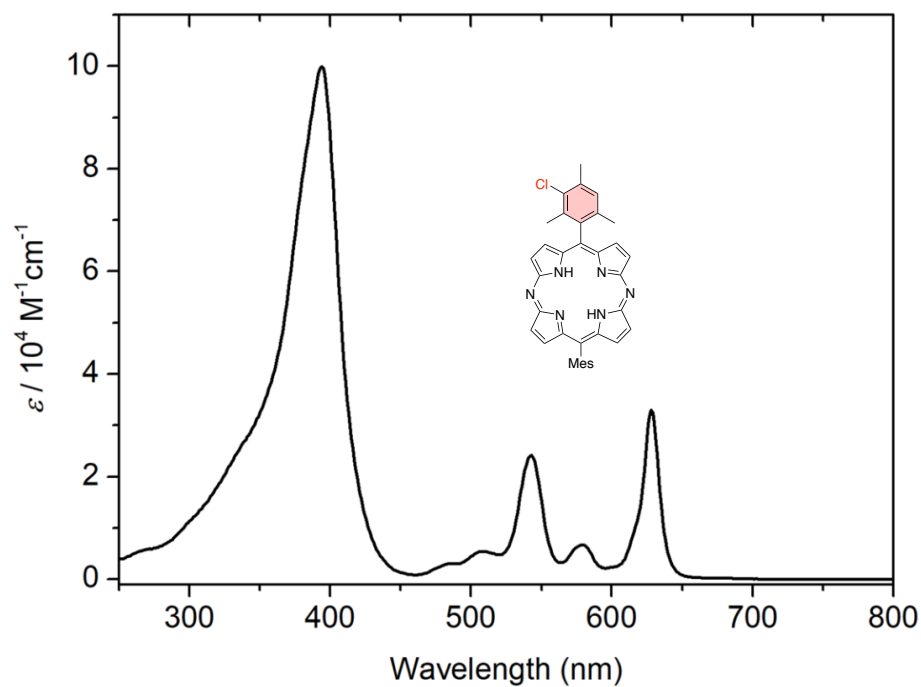

Figure S4. UV-Vis spectrum of 2H-Cl in CH<sub>2</sub>Cl<sub>2</sub>.

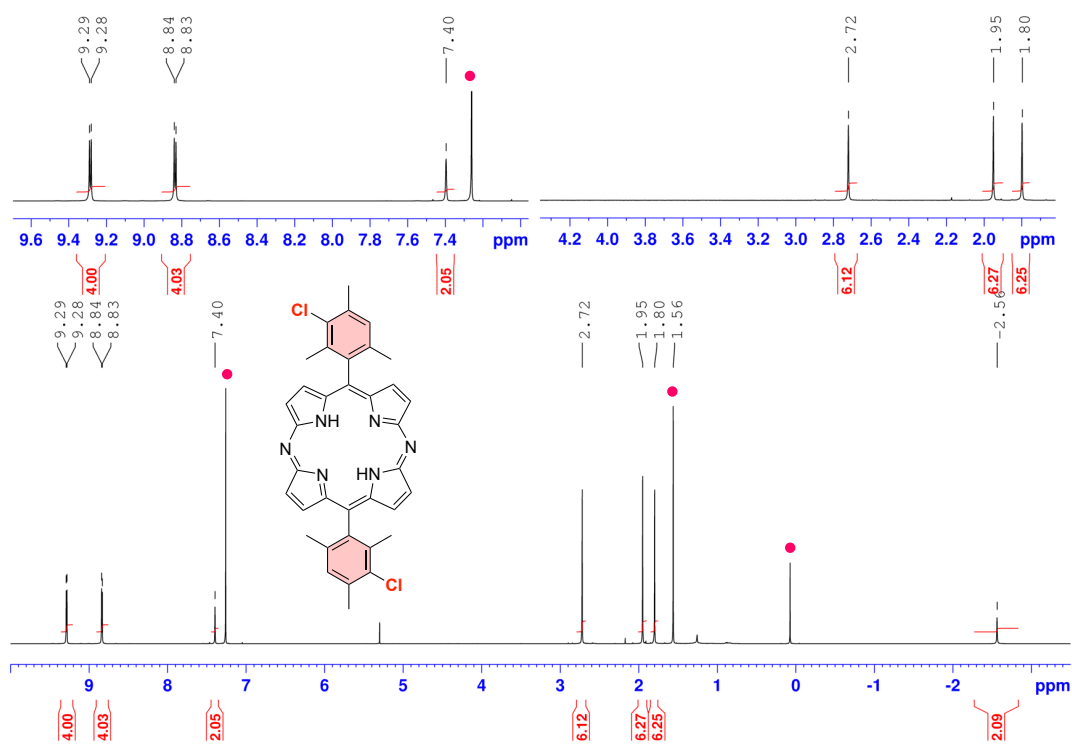

Figure S5.  $^1\text{H}$  NMR spectrum of 3H-Cl in  $\text{CDCl}_3$ .

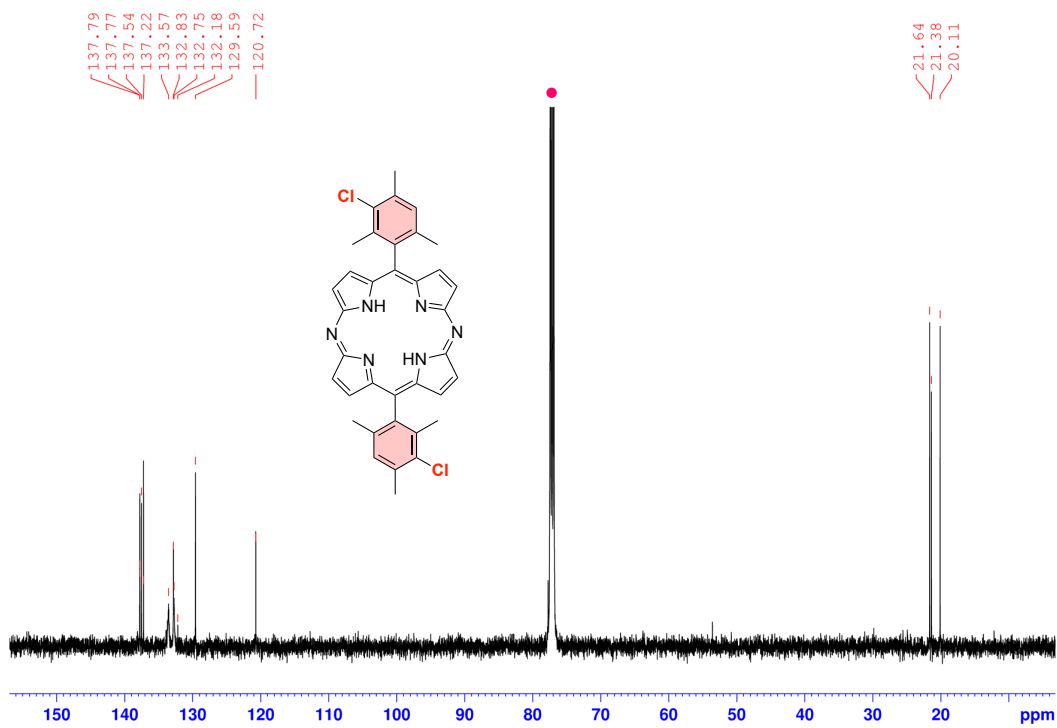

**Figure S6.**  $^{13}\text{C}\{^1\text{H}\}$  NMR spectrum of 3H-Cl in  $\text{CDCl}_3$ .



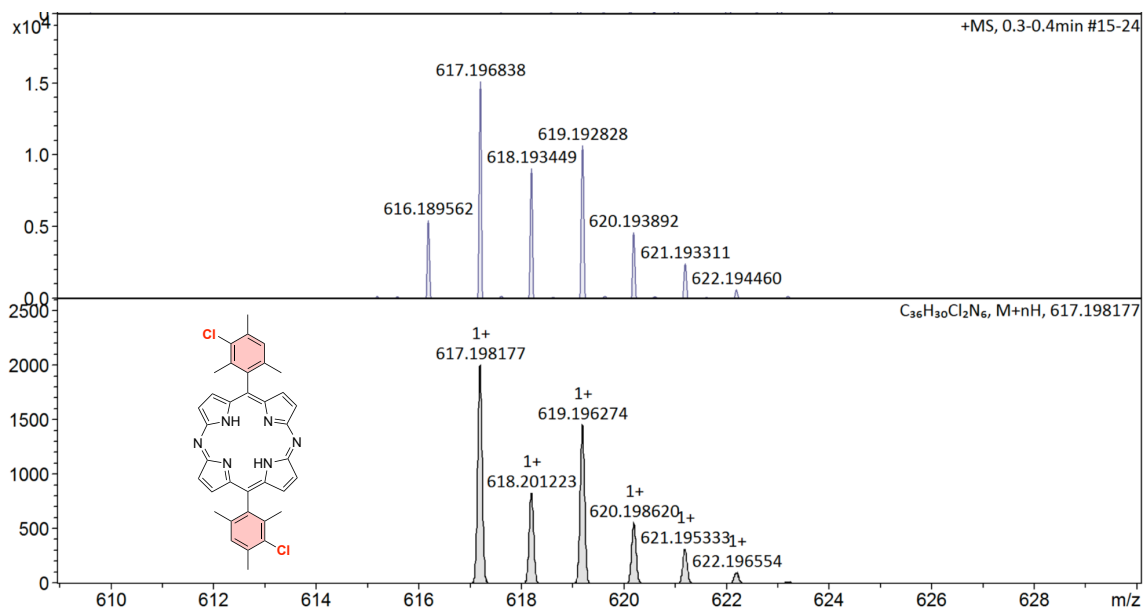

**Figure S7.** APCI-TOF-MS spectrum of **3H-Cl**.

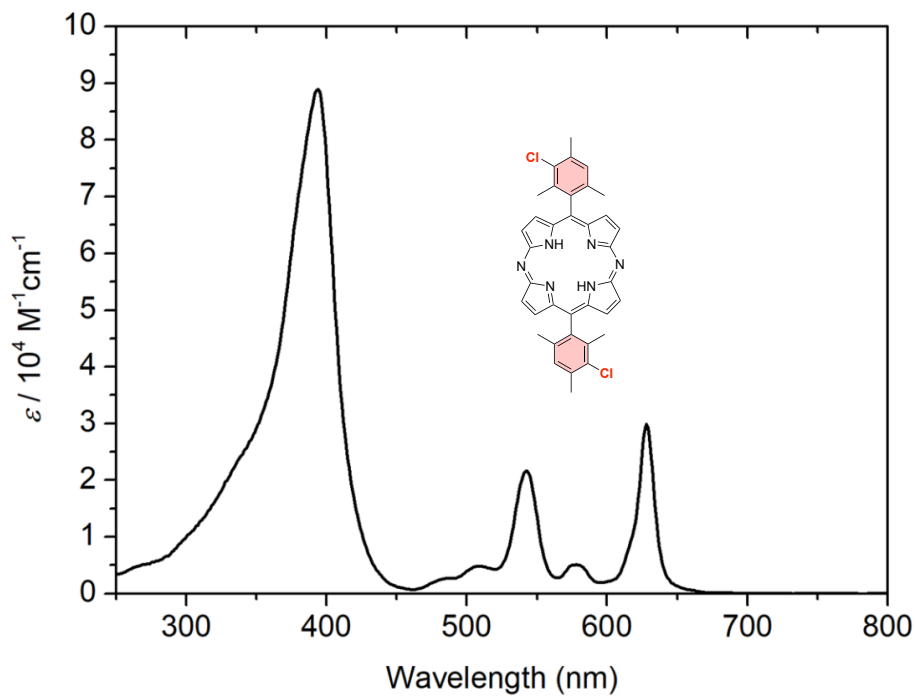

**Figure S8.** UV-Vis spectrum of **3H-Cl** in  $\text{CH}_2\text{Cl}_2$ .

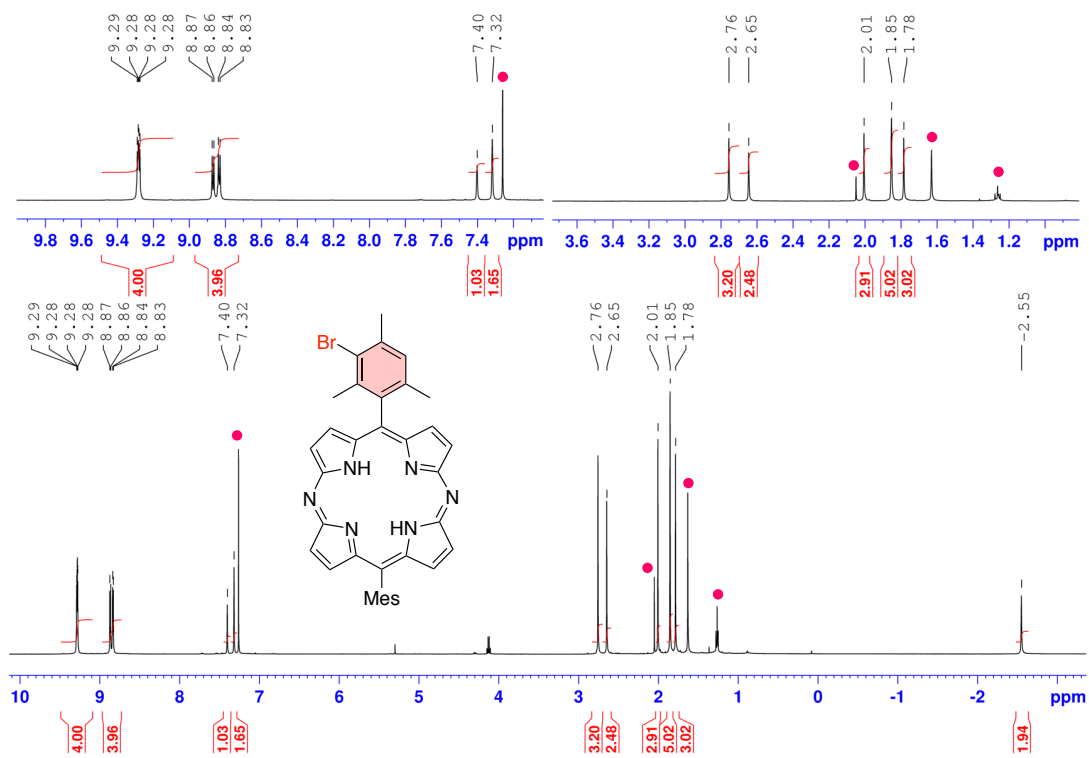

Figure S9.  $^1\text{H}$  NMR spectrum of **2H-Br** in  $\text{CDCl}_3$ .

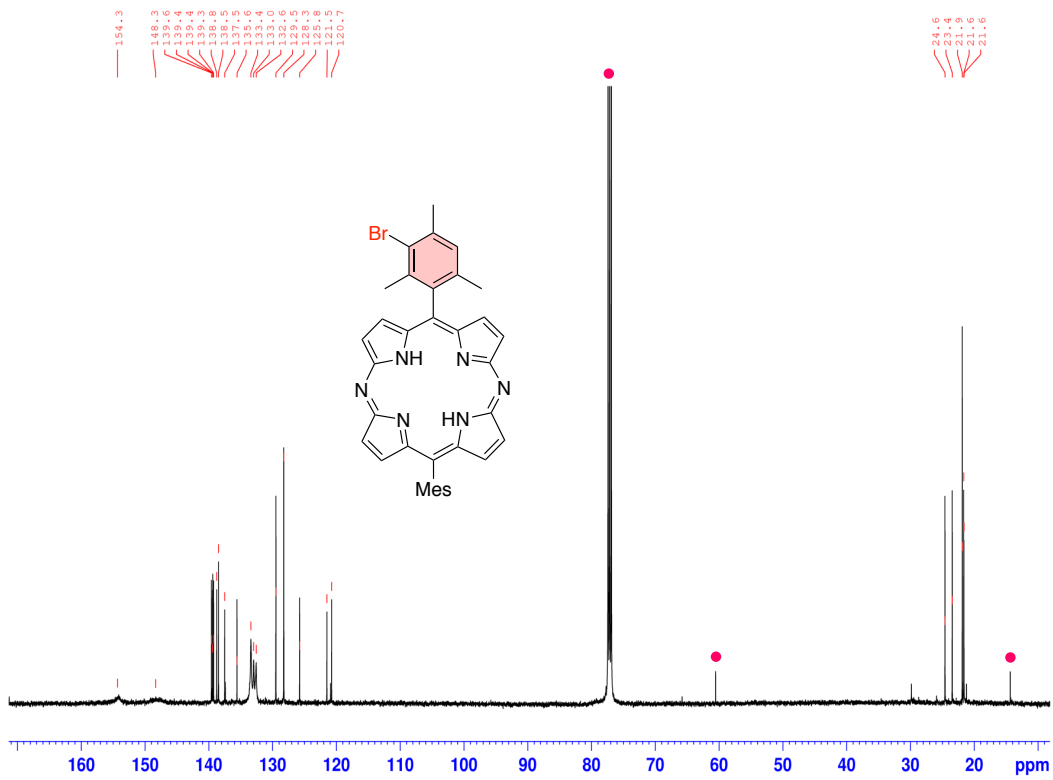

**Figure S10.**  $^{13}\text{C}\{^1\text{H}\}$  NMR spectrum of **2H-Br** in  $\text{CDCl}_3$ .

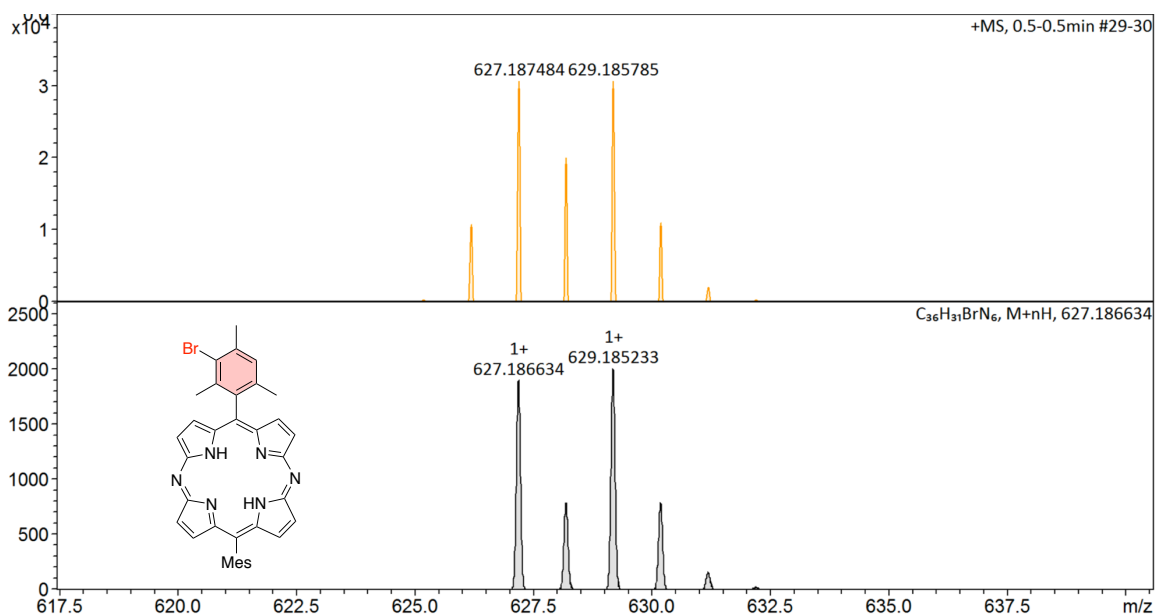

**Figure S11.** APCI-TOF-MS spectrum of **2H-Br**.

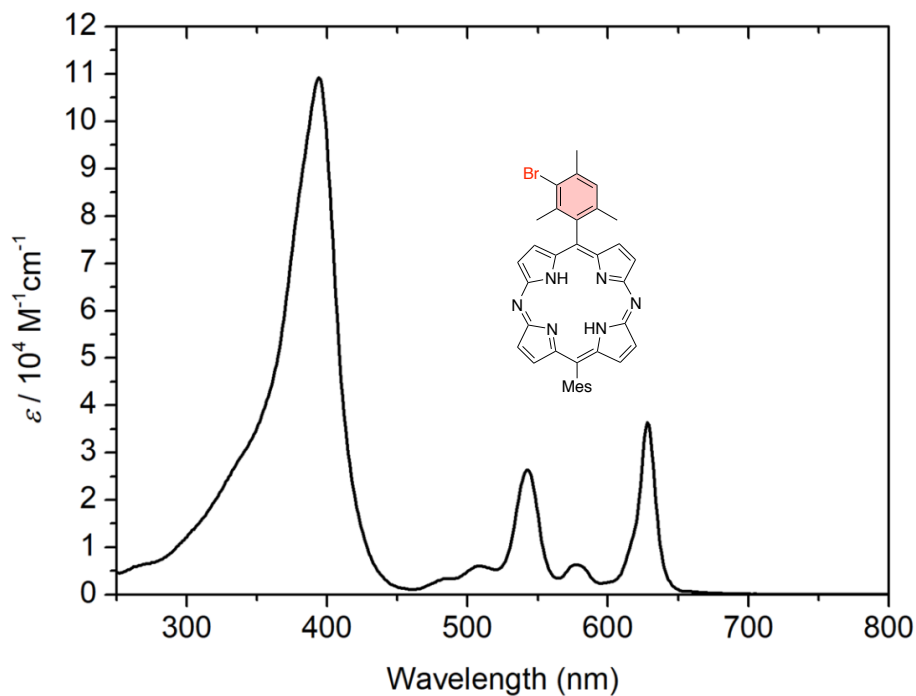

**Figure S12.** UV-Vis spectrum of **2H-Br** in  $\text{CH}_2\text{Cl}_2$ .

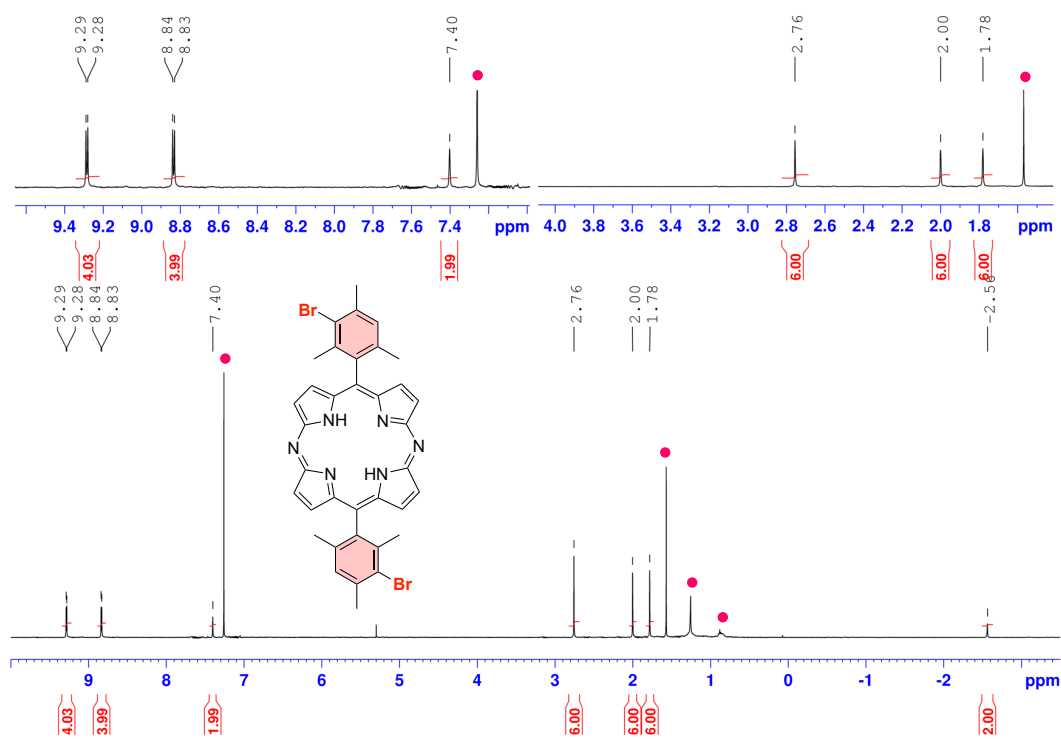

Figure S13.  $^1\text{H}$  NMR spectrum of **3H-Br** in  $\text{CDCl}_3$ .

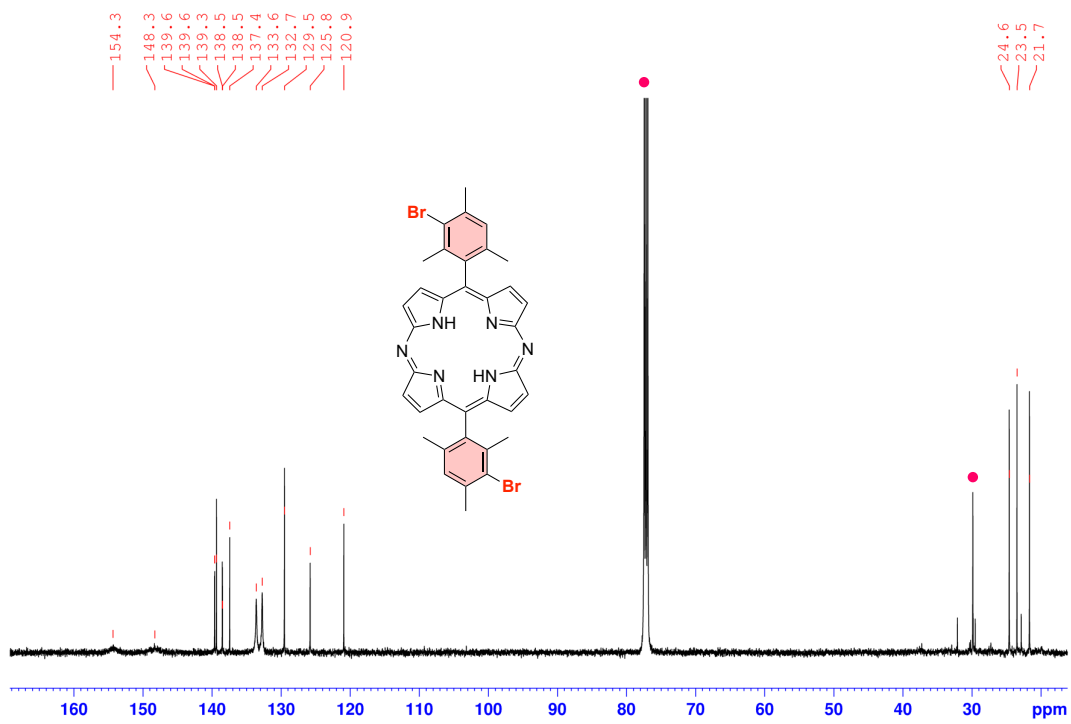

**Figure S14.**  $^{13}\text{C}\{^1\text{H}\}$  NMR spectrum of 3H-Br in  $\text{CDCl}_3$ .

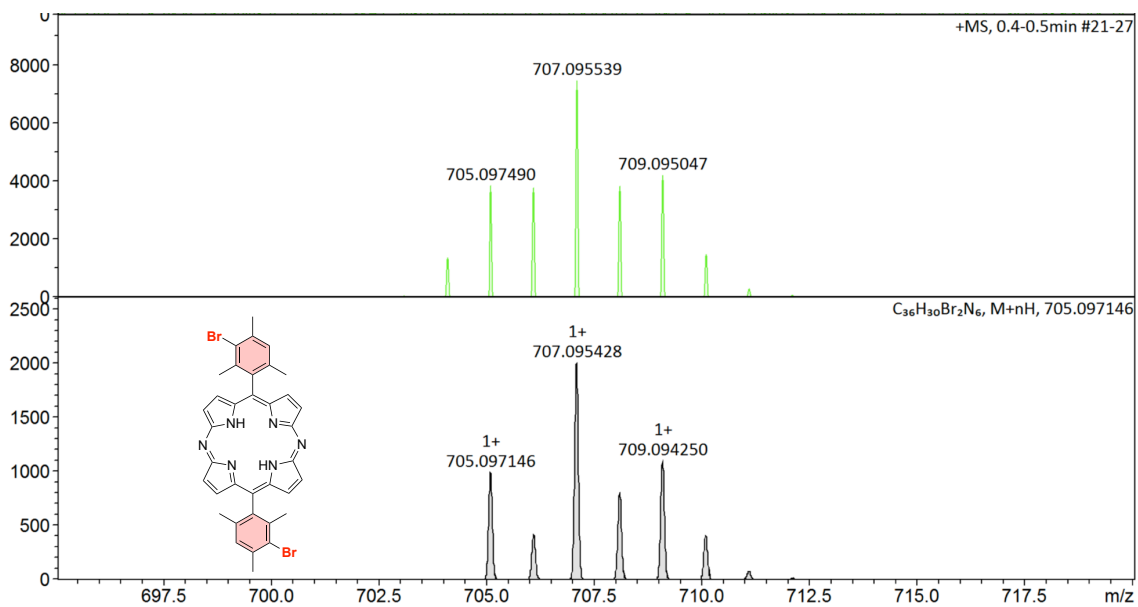

**Figure S15.** APCI-TOF-MS spectrum of **3H-Br**.

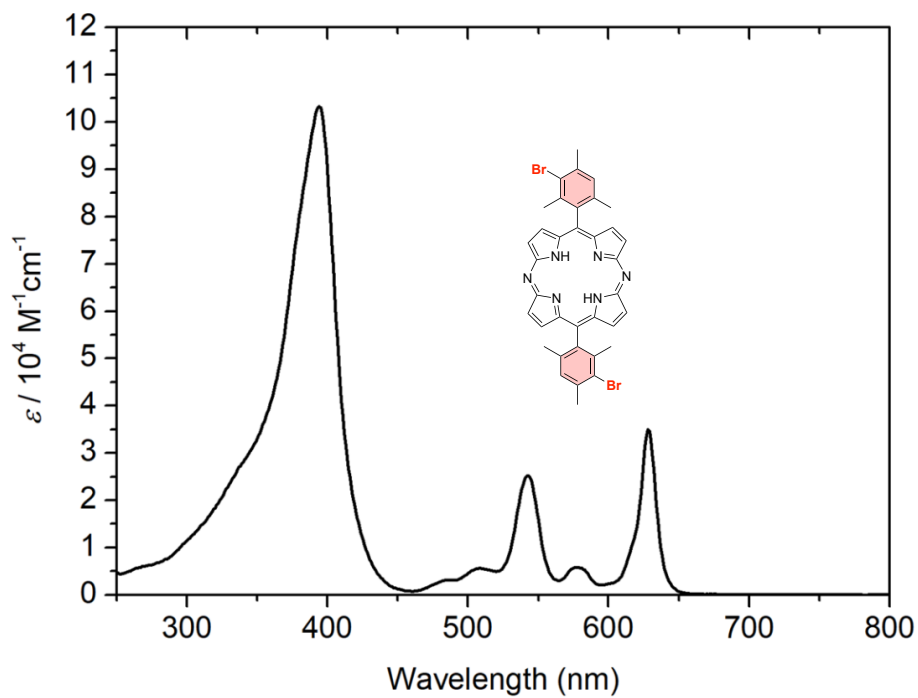

**Figure S16.** UV-Vis spectrum of **3H-Br** in  $\text{CH}_2\text{Cl}_2$ .

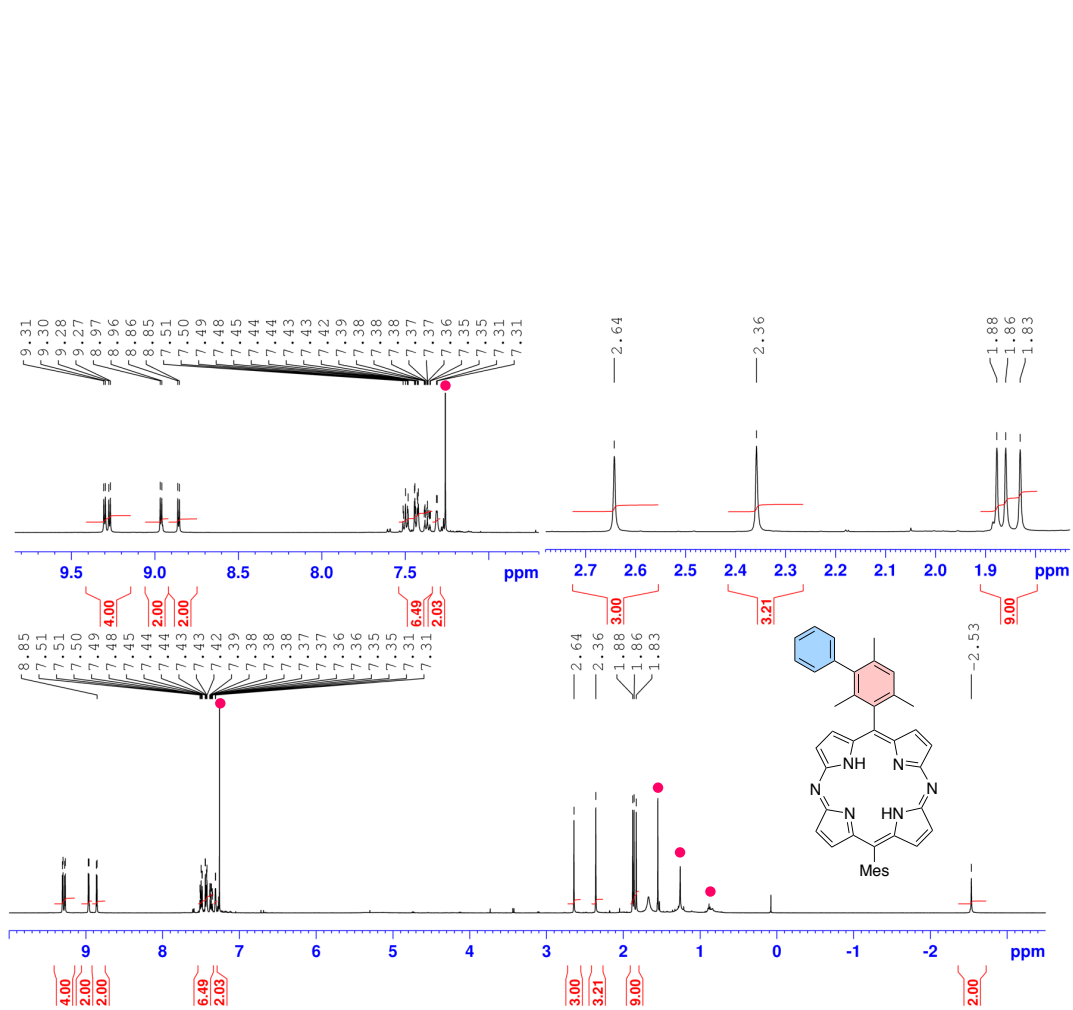

Figure S17.  $^1\text{H}$  NMR spectrum of **7** in  $\text{CDCl}_3$ .



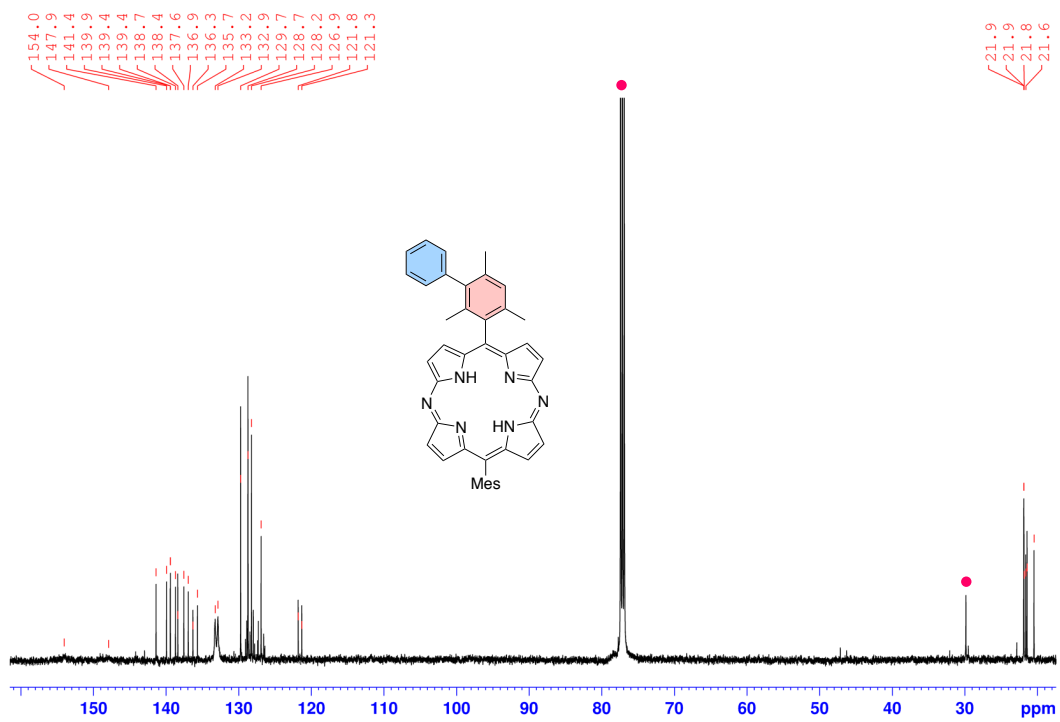

**Figure S18.**  $^{13}\text{C}\{^1\text{H}\}$  NMR spectrum of **7** in  $\text{CDCl}_3$ .

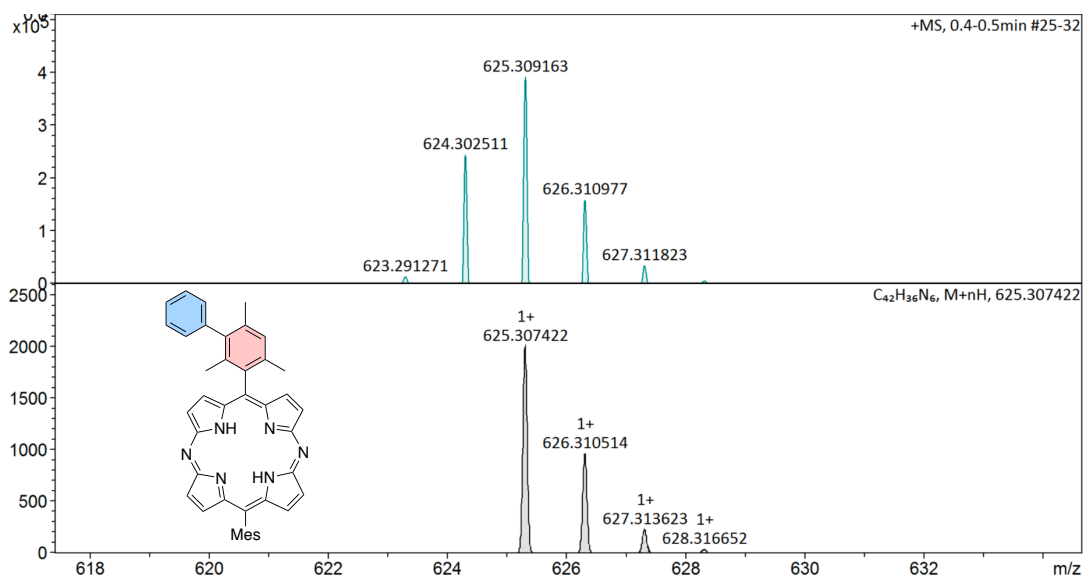

Figure S19. APCI-TOF-MS spectrum of 7.

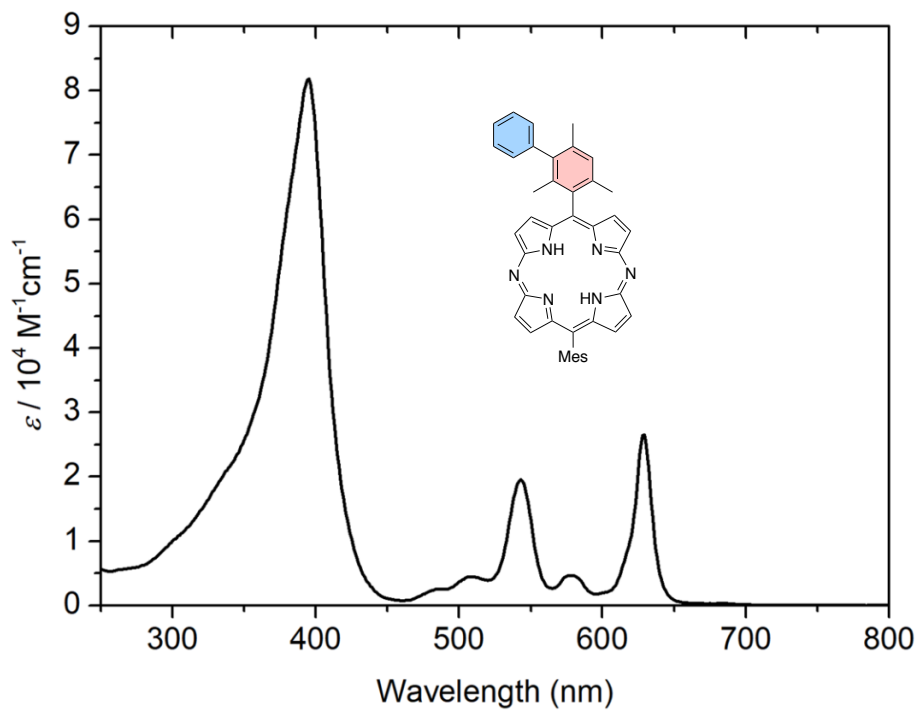

Figure S20. UV-Vis spectrum of 7 in  $CH_2Cl_2$ .

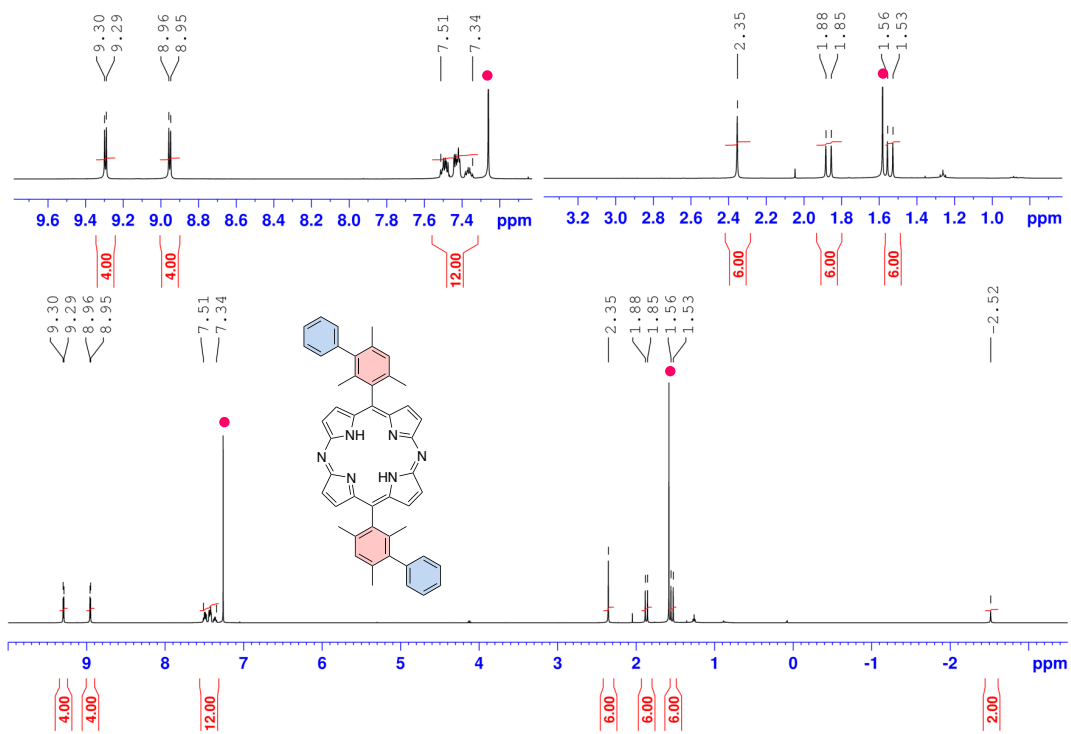

**Figure S21.**  $^1\text{H}$  NMR spectrum of **8a** in  $\text{CDCl}_3$ .

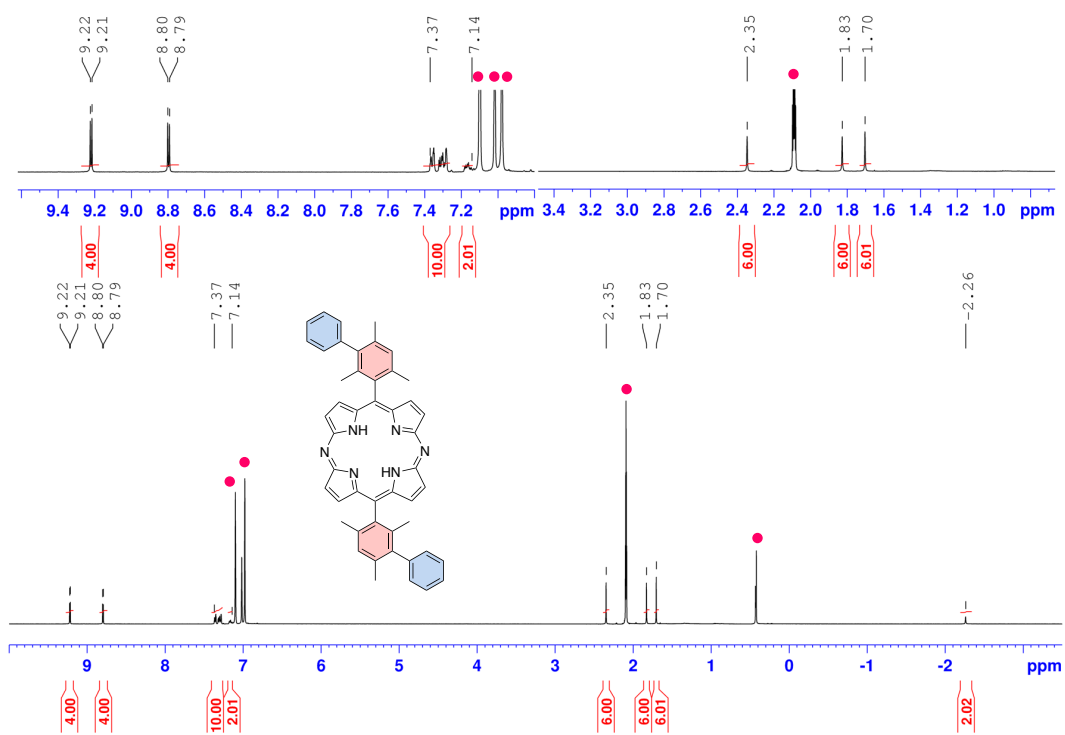

**Figure S22.**  $^1\text{H}$  NMR spectrum of **8a** in  $\text{toluene-}d_8$ .

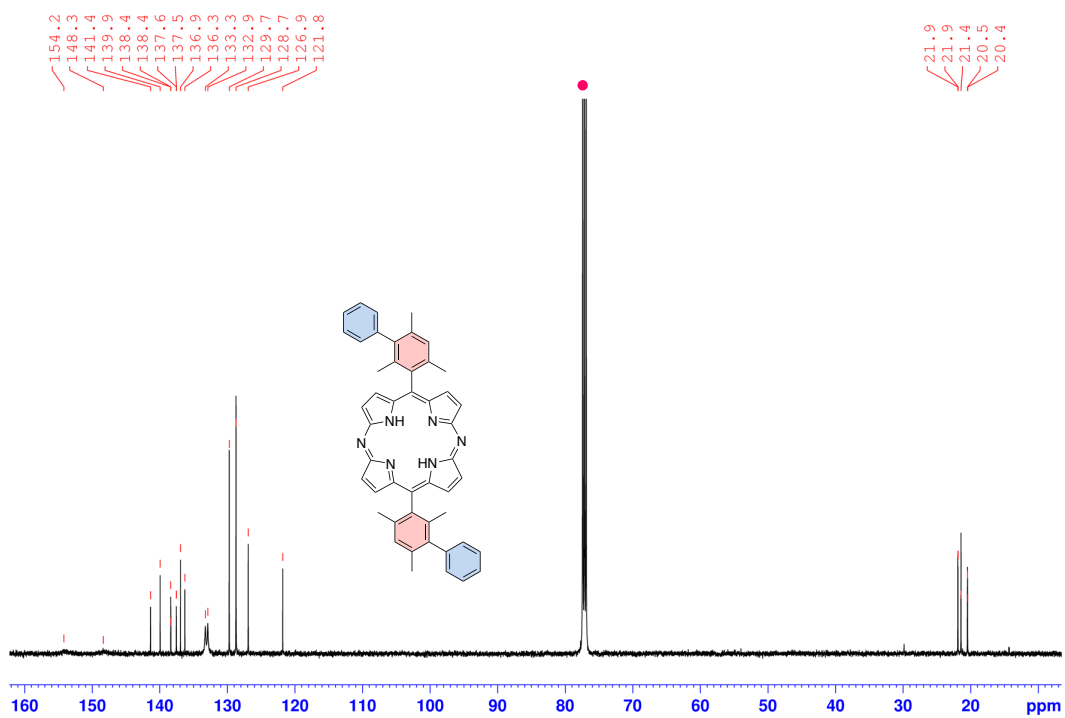

**Figure S23.**  $^{13}\text{C}\{^1\text{H}\}$  NMR spectrum of **8a** in  $\text{CDCl}_3$ .

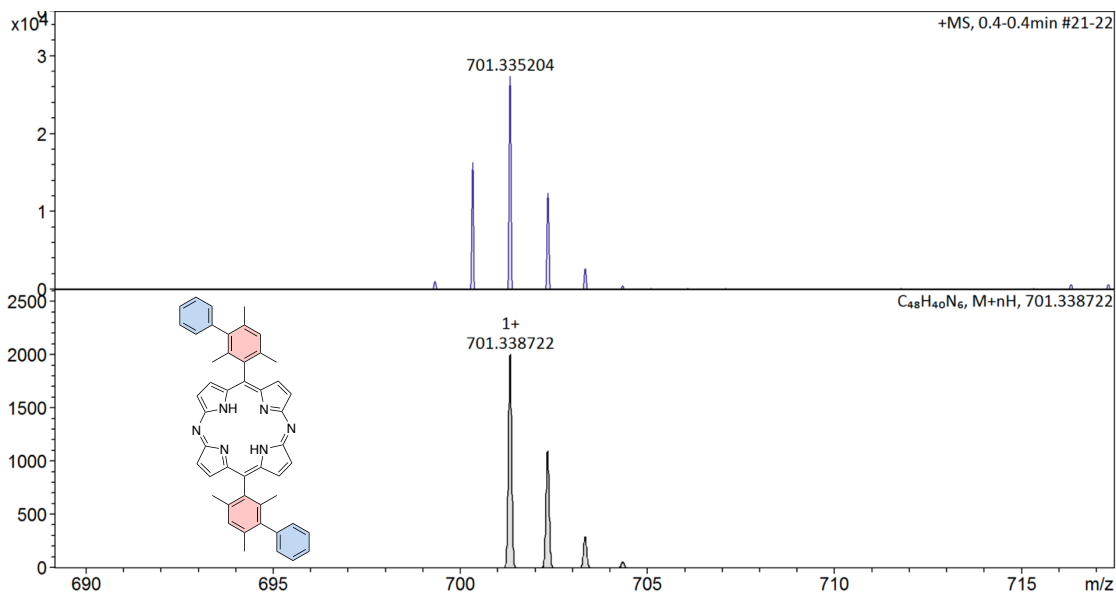

**Figure S24.** APCI-TOF-MS spectrum of **8a**.

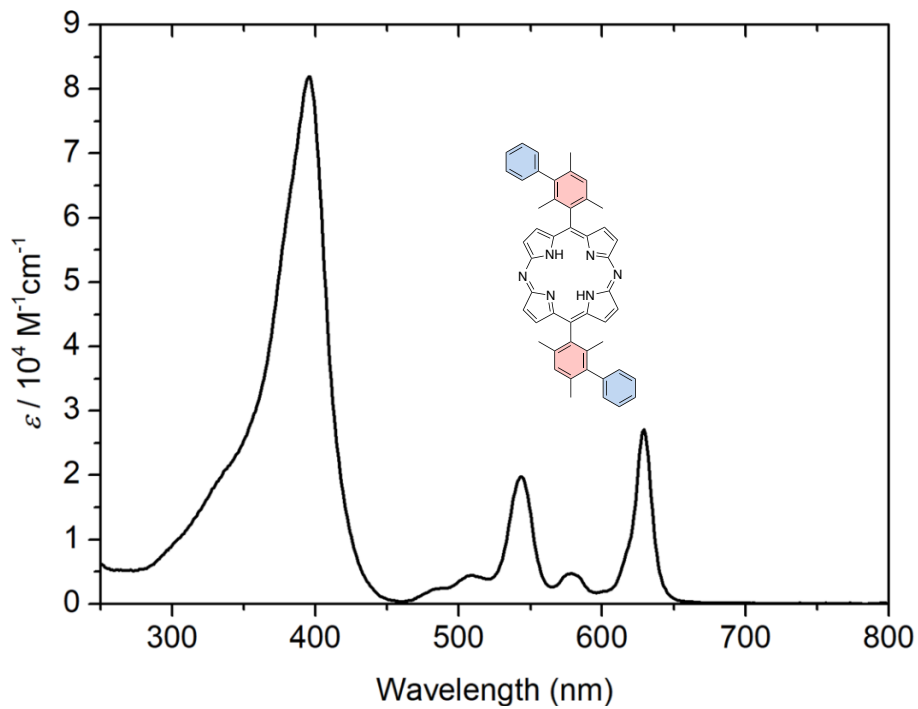

**Figure S25.** UV-Vis spectrum of **8a** in  $\text{CH}_2\text{Cl}_2$ .

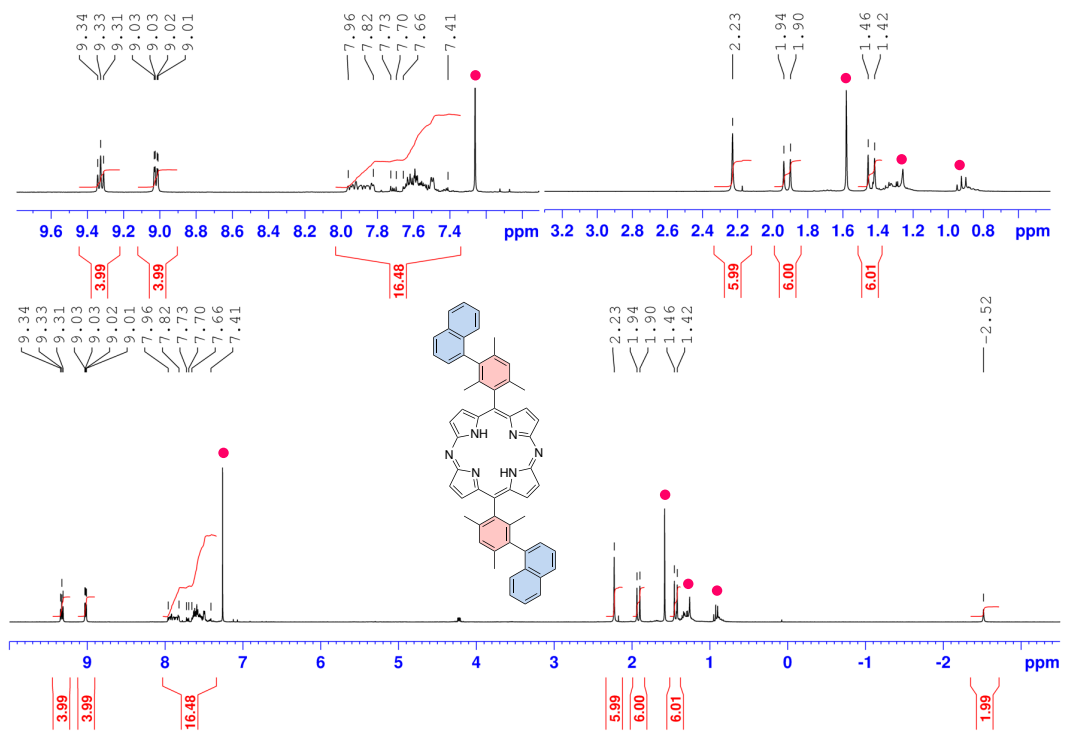

Figure S26.  $^1\text{H}$  NMR spectrum of **8b** in  $\text{CDCl}_3$ .

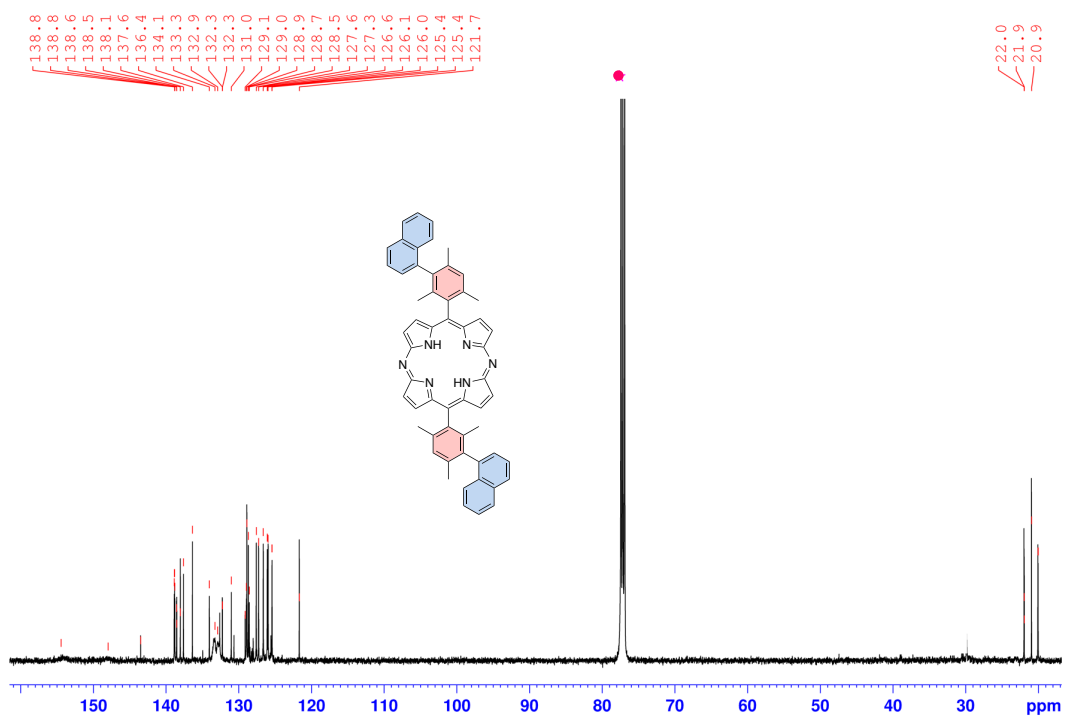

Figure S27.  $^{13}\text{C}\{^1\text{H}\}$  NMR spectrum of **8b** in  $\text{CDCl}_3$ .



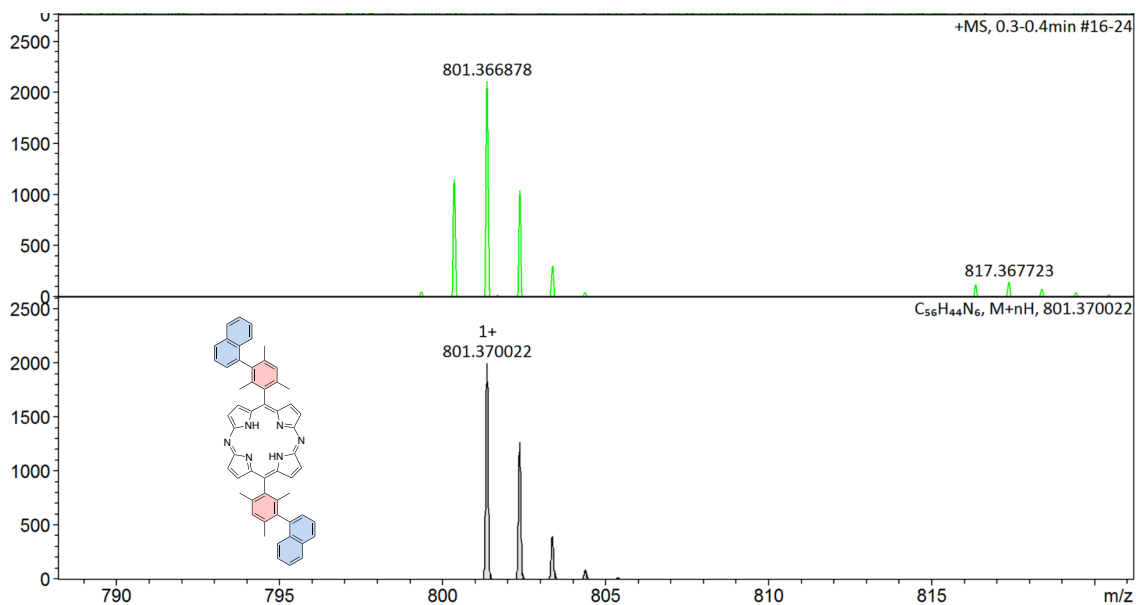

**Figure S28.** APCI-TOF-MS spectrum of **8b**.

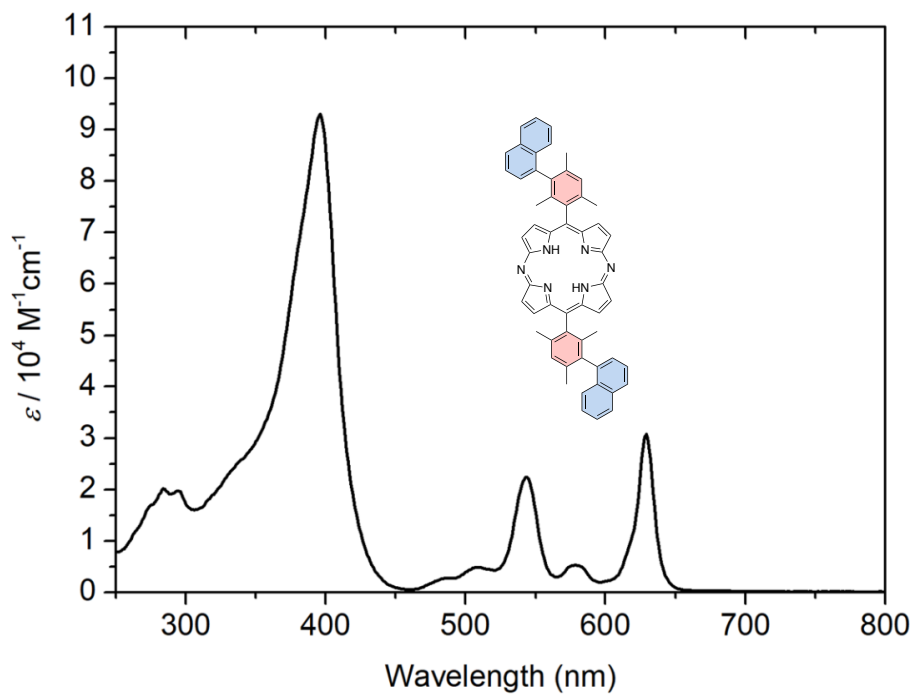

**Figure S29.** UV-Vis spectrum of **8b** in  $\text{CH}_2\text{Cl}_2$ .

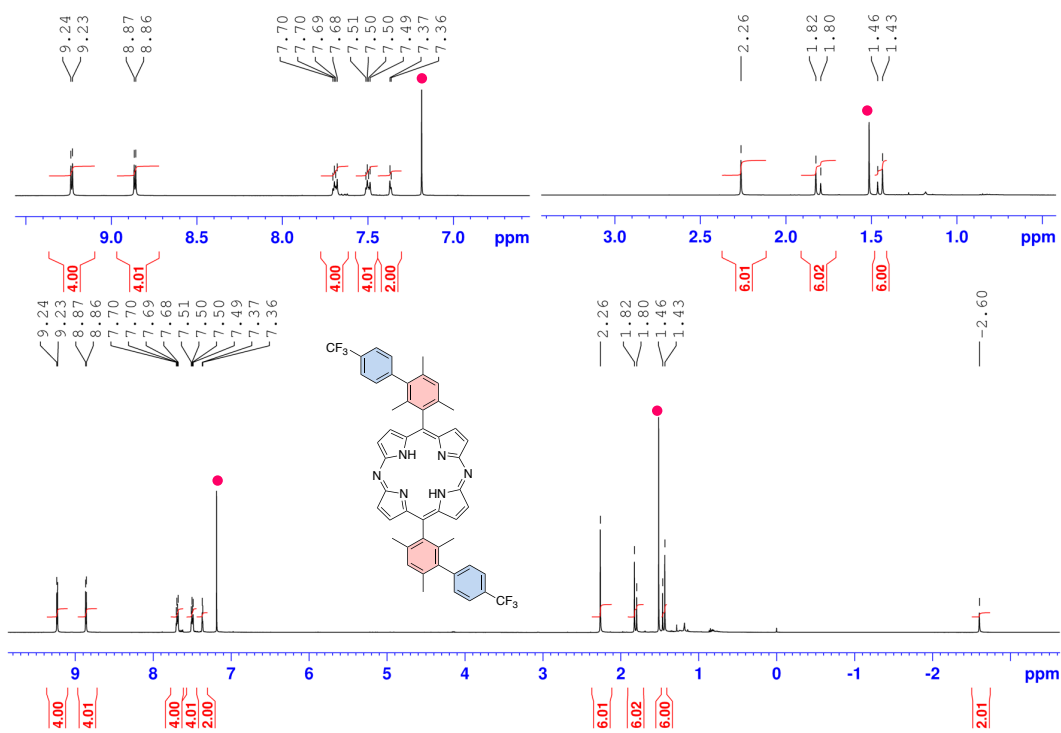

Figure S30.  $^1\text{H}$  NMR spectrum of **8c** in  $\text{CDCl}_3$ .

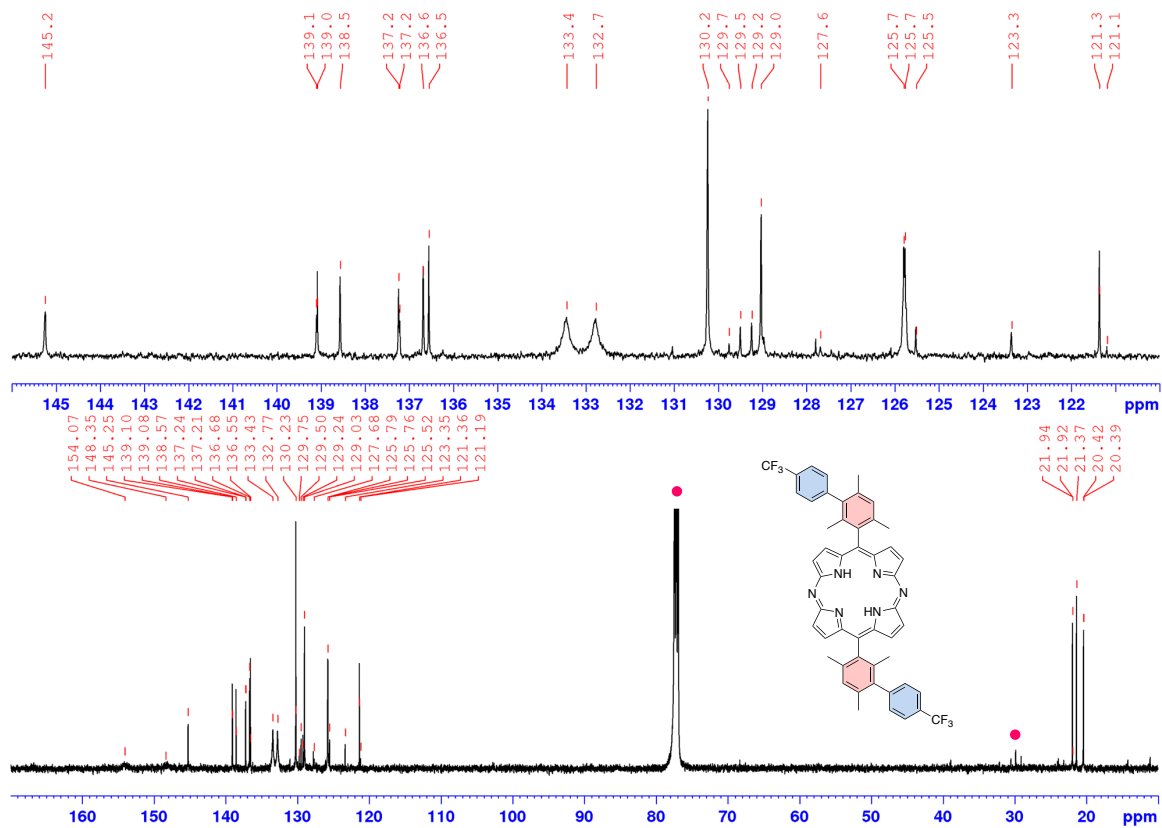

Figure S31.  $^{13}\text{C}\{^1\text{H}\}$  NMR spectrum of **8c** in  $\text{CDCl}_3$ .

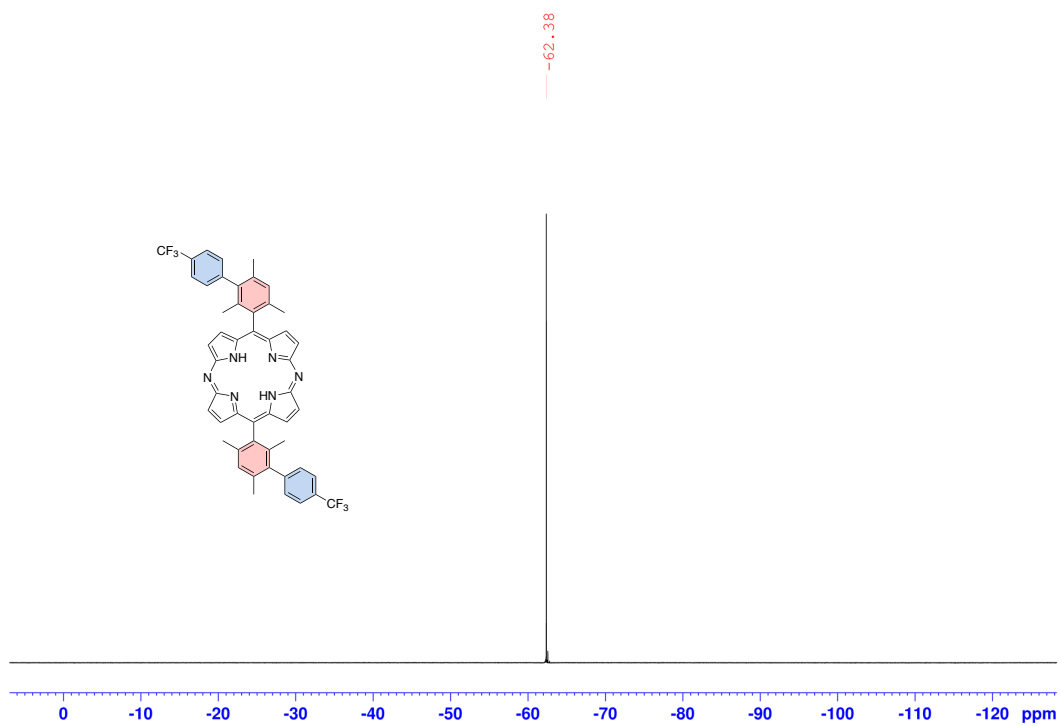

**Figure S32.**  $^{19}\text{F}$   $\{^1\text{H}\}$  NMR spectrum of **8c** in  $\text{CDCl}_3$ .

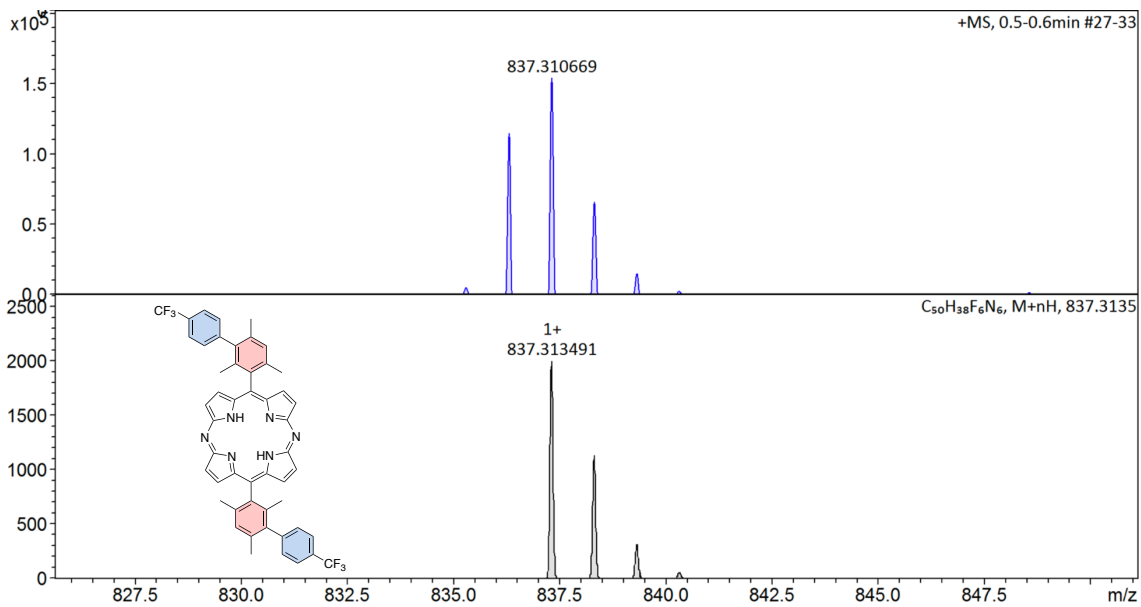

**Figure S33.** APCI-TOF-MS spectrum of **8c**.

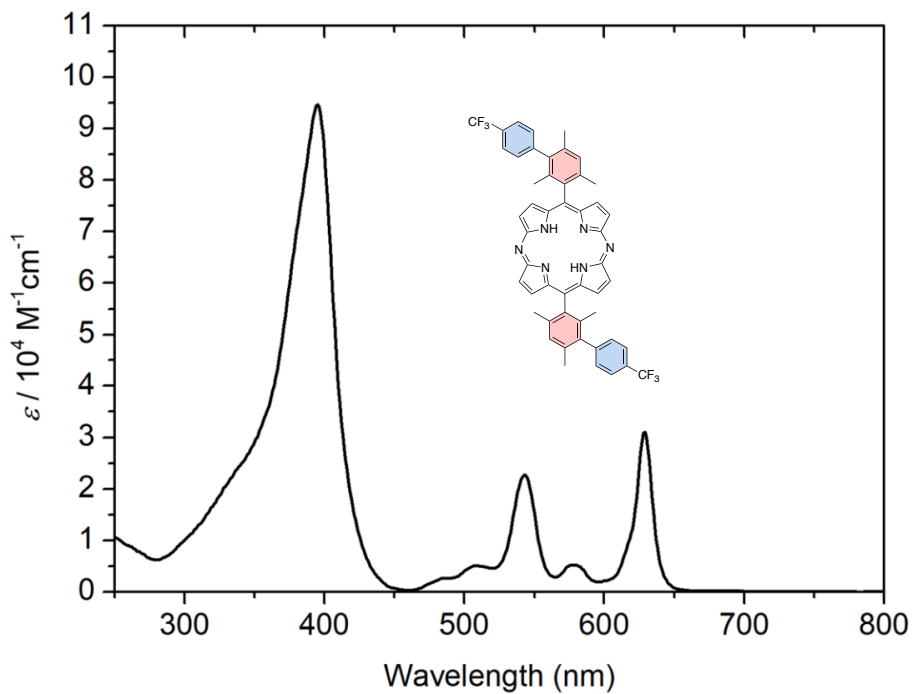

**Figure S34.** UV-Vis spectrum of **8c** in  $\text{CH}_2\text{Cl}_2$ .

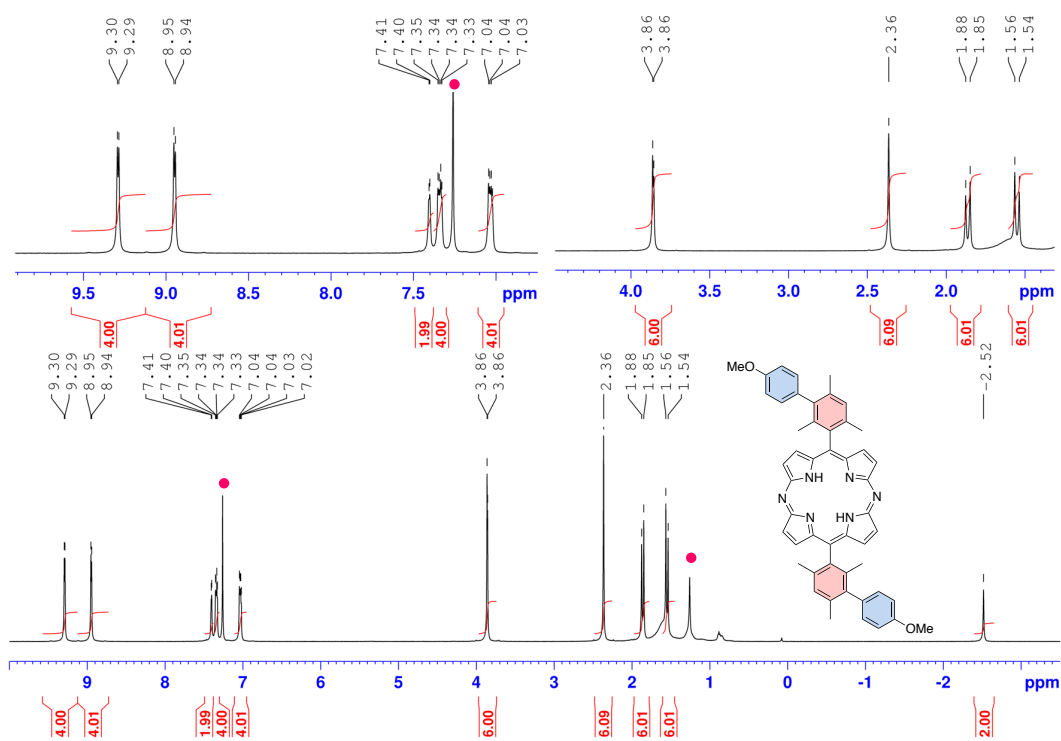

Figure S35. <sup>1</sup>H NMR spectrum of **8d** in CDCl<sub>3</sub>.

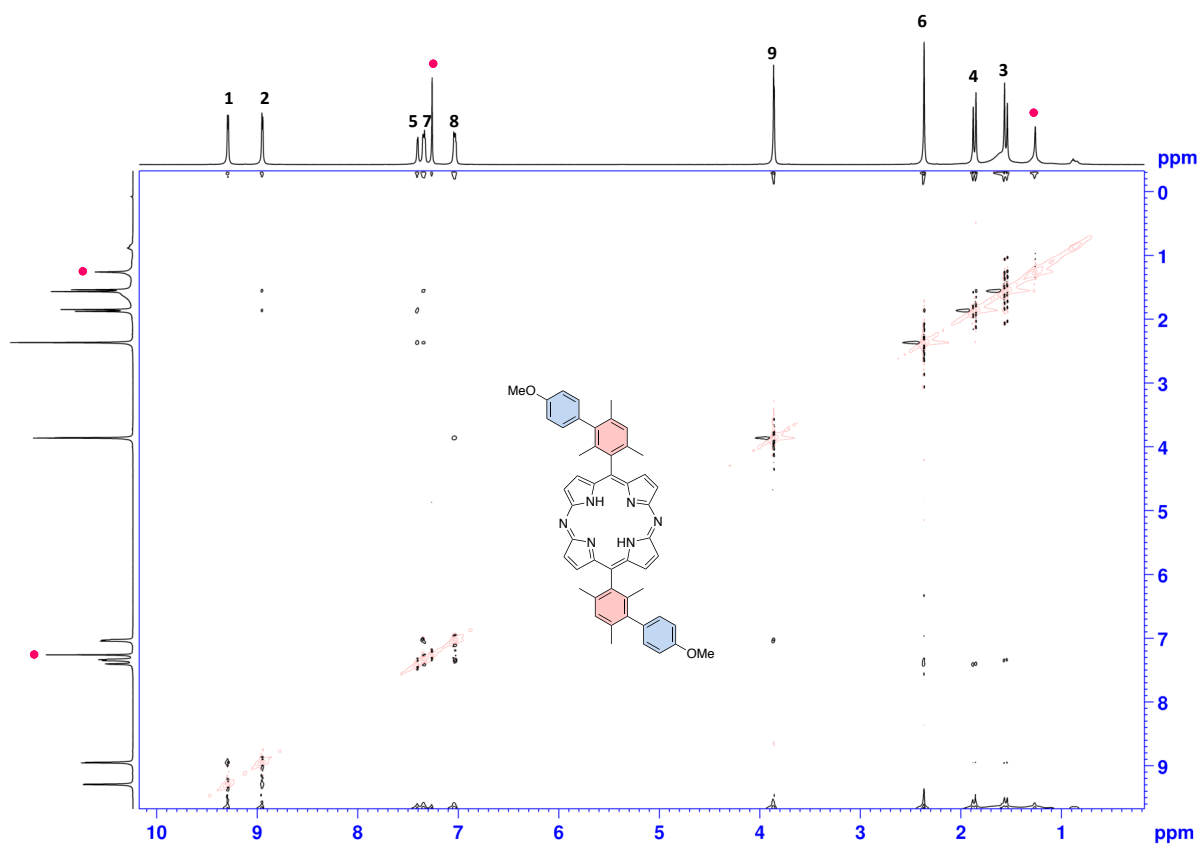

Figure S36. ROESY spectrum of **8d** in CDCl<sub>3</sub>.

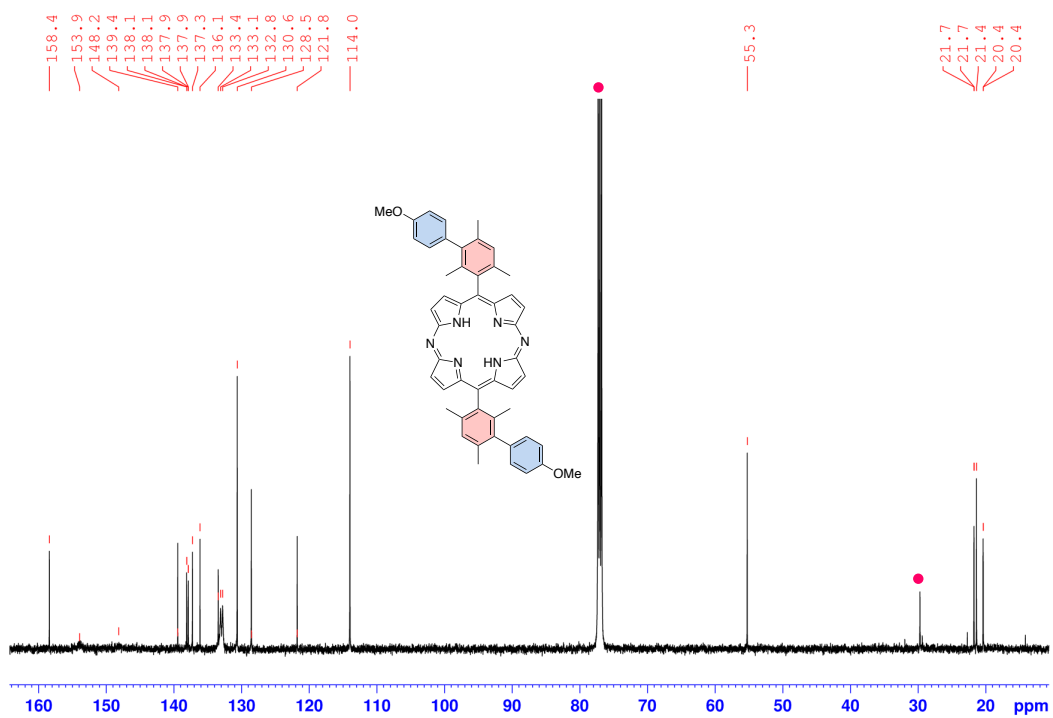

**Figure S37.**  $^{13}\text{C}\{^1\text{H}\}$  NMR spectrum of **8d** in  $\text{CDCl}_3$ .



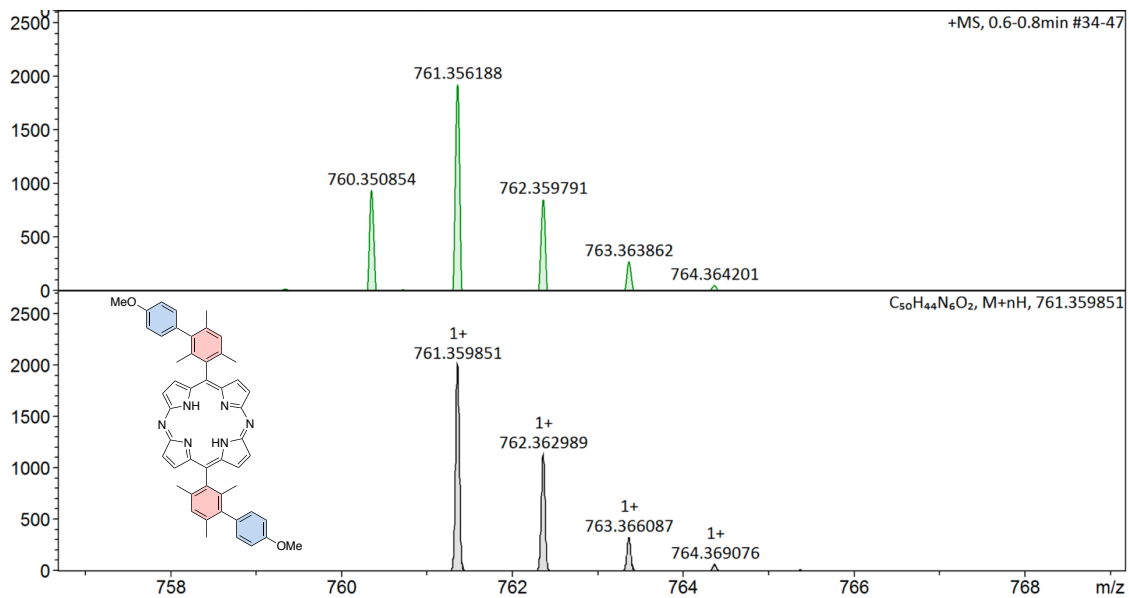

Figure S38. APCI-TOF-MS spectrum of **8d**.

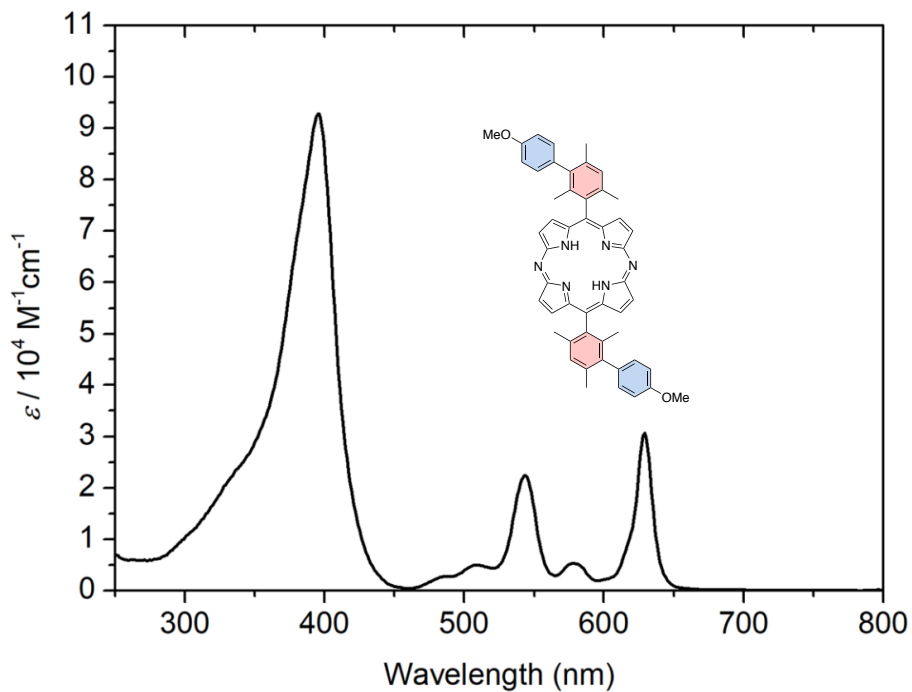

Figure S39. UV-Vis spectrum of **8d** in  $\text{CH}_2\text{Cl}_2$ .

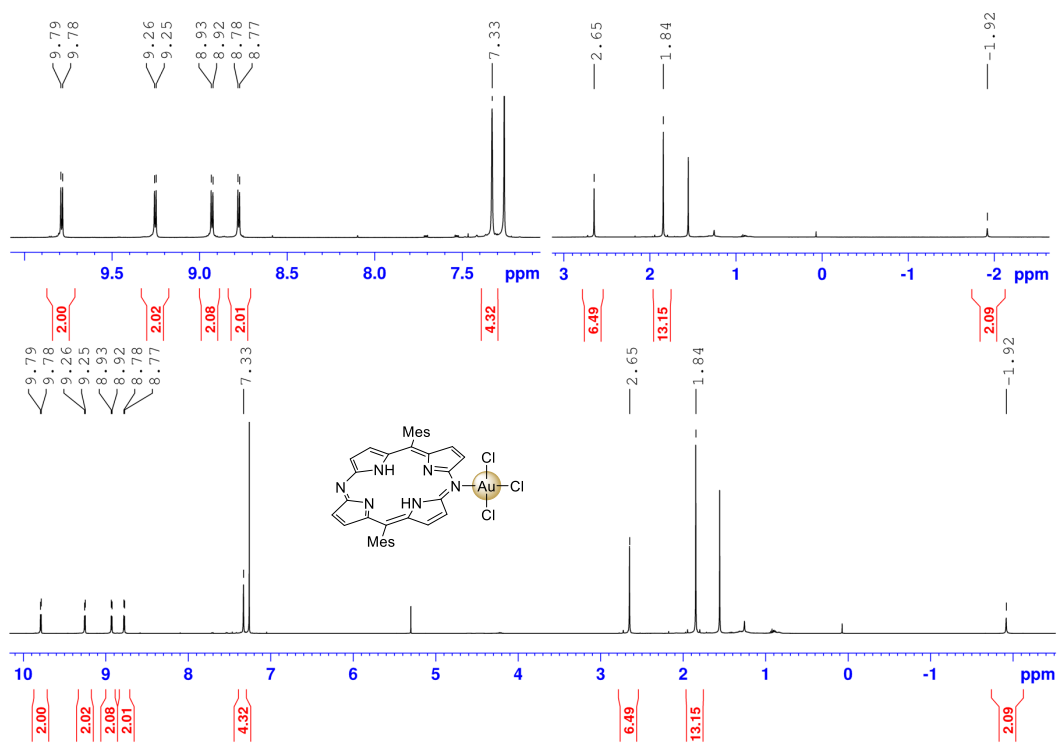

Figure S40.  $^1\text{H}$  NMR spectrum of **9** in  $\text{CDCl}_3$ .

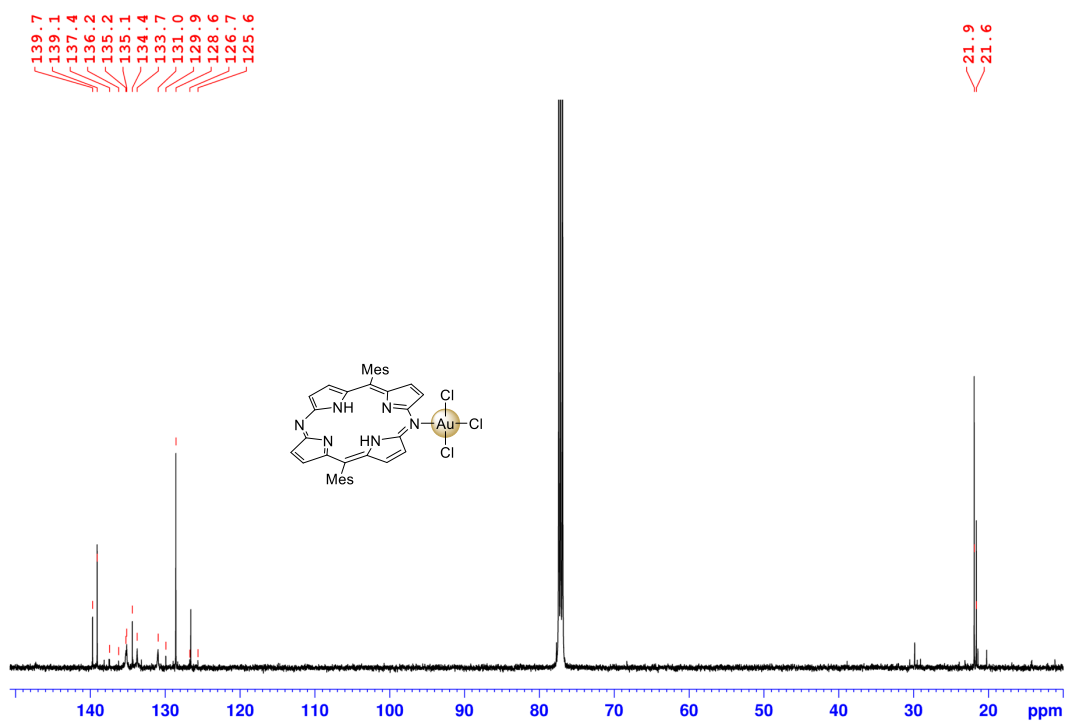

Figure S41.  $^{13}\text{C}\{^1\text{H}\}$  NMR spectrum of **9** in  $\text{CDCl}_3$ .

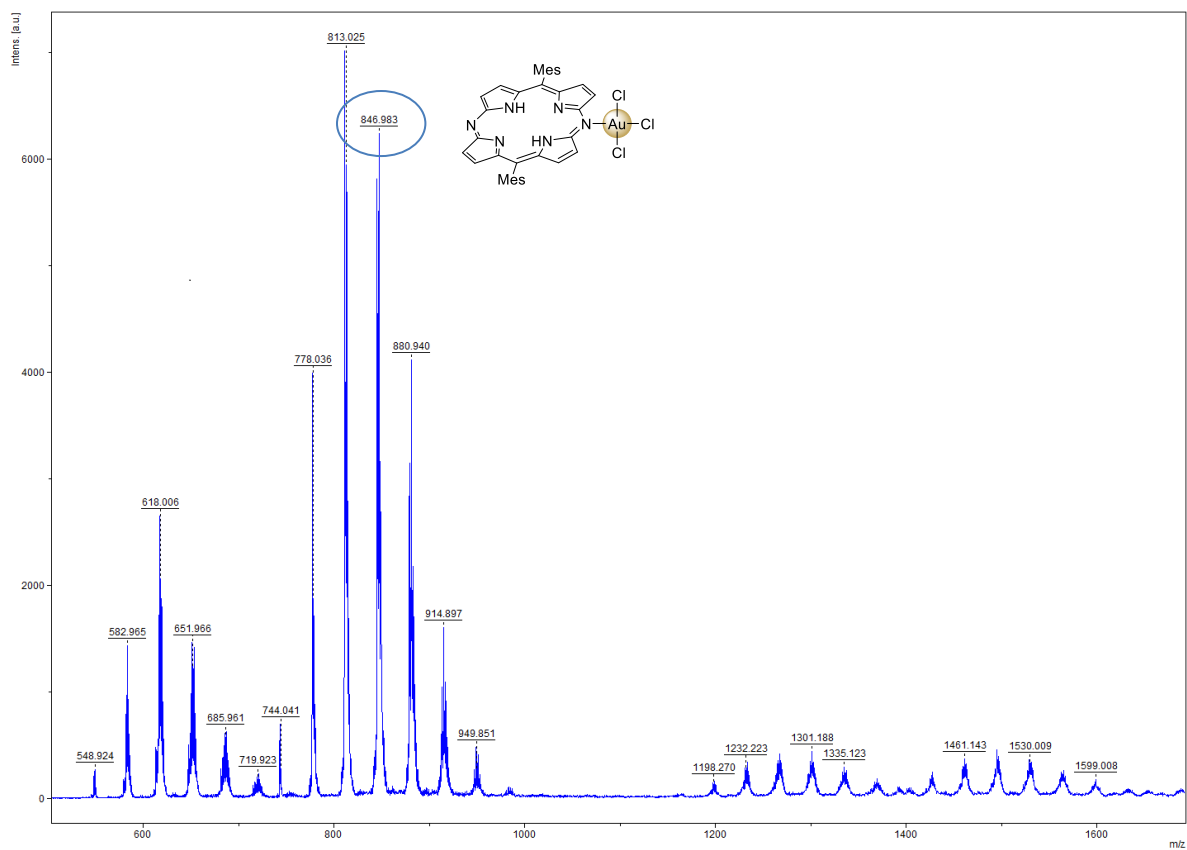

**Figure S42.** MALDI-TOF-MS spectrum of **9**.

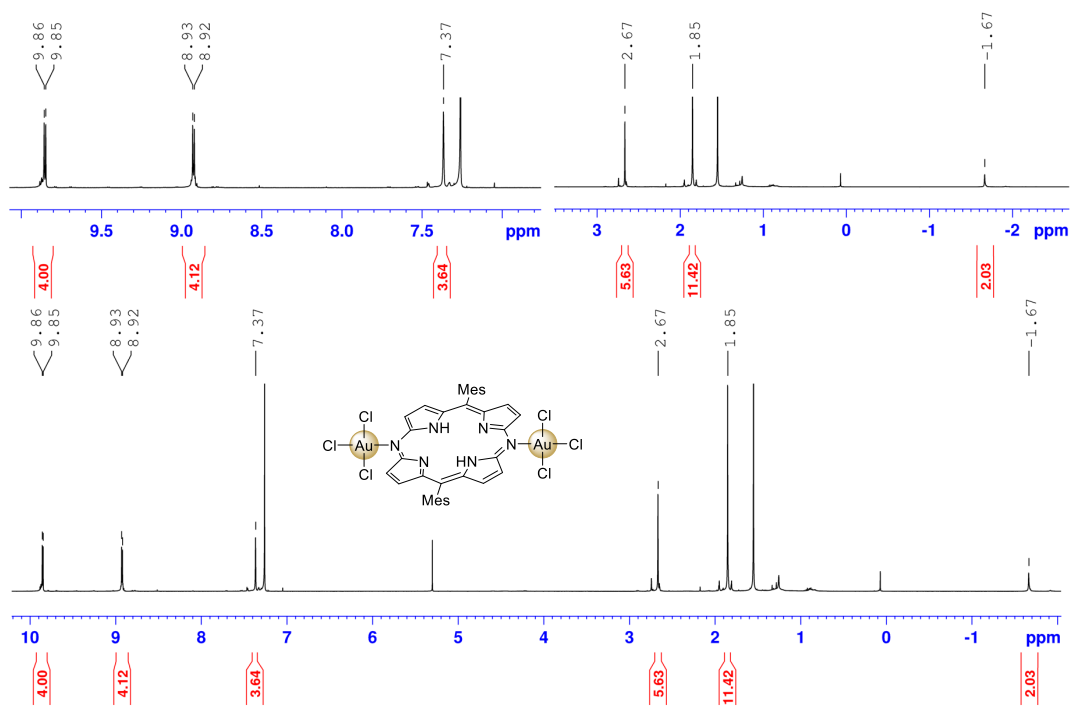

Figure S43. <sup>1</sup>H NMR spectrum of **10** in CDCl<sub>3</sub>.

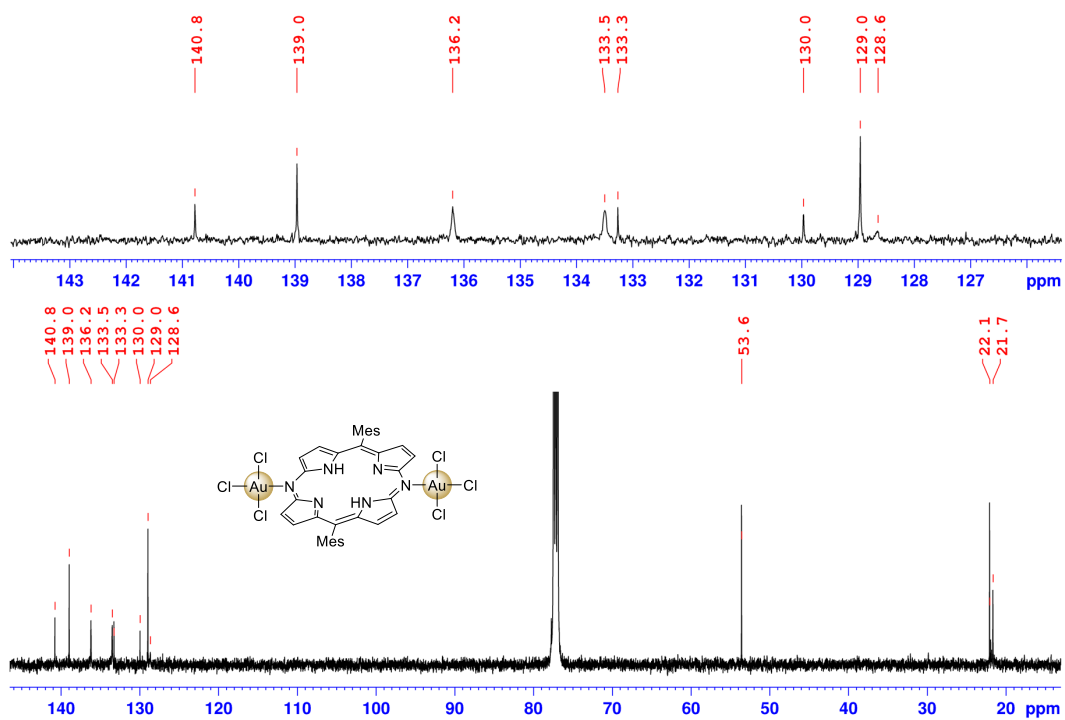

Figure S44.  $^{13}\text{C}\{^1\text{H}\}$  NMR spectrum of **10** in  $\text{CDCl}_3$ .

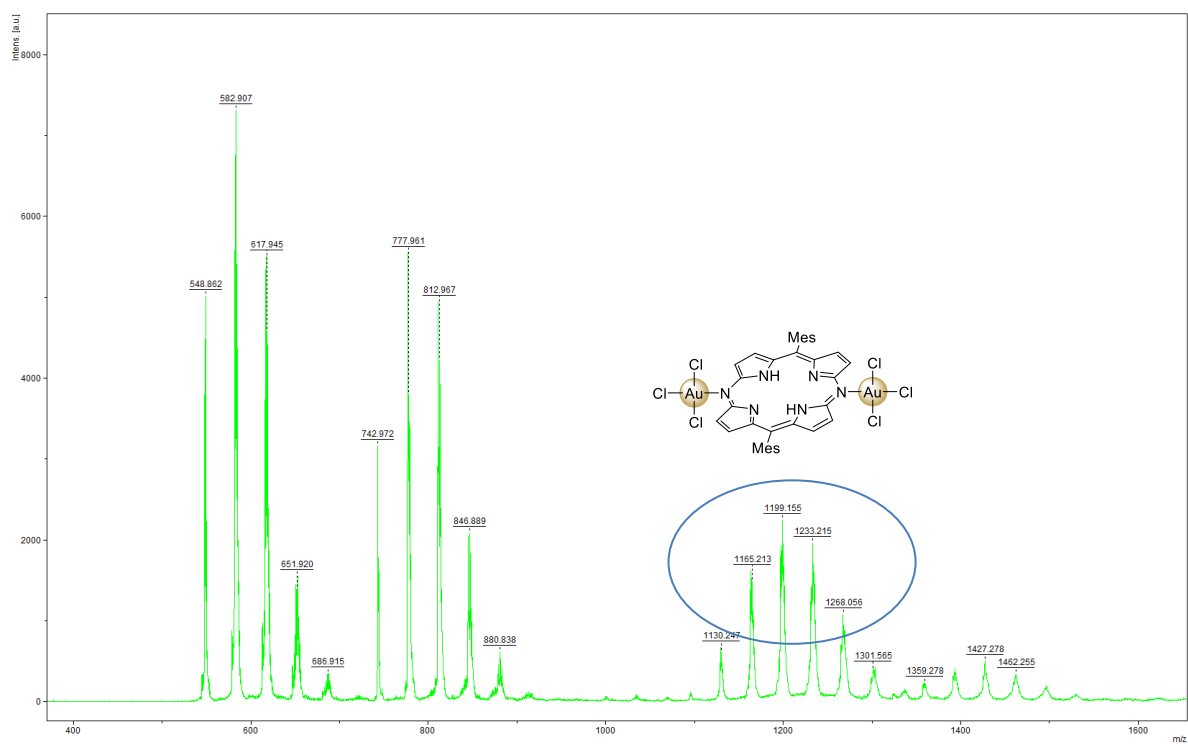

**Figure S45.** MALDI-TOF-MS spectrum of **10**.

### X-ray Diffraction Analysis

X-ray data of **3H-Cl**, **9** and **10** were taken on a Rigaku CCD diffractometer (Saturn 724 with MicroMax-007) with Varimax Mo optics using graphite monochromated Mo-K $\alpha$  radiation ( $\lambda = 0.71075$  Å). Crystallographic data for **3H-Cl**, **9** and **10** have been deposited with the Cambridge Crystallographic Data Centre as supplementary publication no. CCDC-2014575, 2031076, and 2032240, respectively.

**Table S1.** Crystal data and structure refinements for **3H-Cl**, **9** and **10**.

| Compound                                                    | <b>3H-Cl</b>                                     | <b>9</b>                                                                             | <b>10</b>                                                              |
|-------------------------------------------------------------|--------------------------------------------------|--------------------------------------------------------------------------------------|------------------------------------------------------------------------|
| Empirical Formula                                           | C <sub>18</sub> H <sub>14</sub> ClN <sub>3</sub> | C <sub>18.5</sub> H <sub>16.5</sub> Au <sub>0.5</sub> Cl <sub>3</sub> N <sub>3</sub> | C <sub>18.5</sub> H <sub>16.5</sub> AuCl <sub>4.5</sub> N <sub>3</sub> |
| <i>M<sub>w</sub></i>                                        | 307.77                                           | 485.68                                                                               | 637.34                                                                 |
| Crystal System                                              | monoclinic                                       | monoclinic                                                                           | monoclinic                                                             |
| Space Group                                                 | <i>P</i> 2 <sub>1</sub> / <i>a</i> (No. 14)      | <i>C</i> 2/ <i>c</i> (No. 15)                                                        | <i>P</i> 2 <sub>1</sub> / <i>a</i> (No. 14)                            |
| <i>a</i>                                                    | 7.8431(6) Å                                      | 26.5741(6) Å                                                                         | 14.5210(7) Å                                                           |
| <i>b</i>                                                    | 23.827(2) Å                                      | 11.7909(2) Å                                                                         | 10.7731(5) Å                                                           |
| <i>c</i>                                                    | 8.7706(7) Å                                      | 12.2513(3) Å                                                                         | 13.0542(5) Å                                                           |
| $\beta$                                                     | 114.206(9)°                                      | 90.465(2)°                                                                           | 93.566(4)°                                                             |
| Volume                                                      | 1494.9(2) Å <sup>3</sup>                         | 3838.60(14) Å <sup>3</sup>                                                           | 2038.20(16) Å <sup>3</sup>                                             |
| <i>Z</i>                                                    | 4                                                | 8                                                                                    | 4                                                                      |
| Density (calcd.)                                            | 1.367 g/cm <sup>3</sup>                          | 1.681 g/cm <sup>3</sup>                                                              | 2.077 g/cm <sup>3</sup>                                                |
| Goodness-of-Fit                                             | 1.173                                            | 1.081                                                                                | 1.077                                                                  |
| <i>R</i> <sub>1</sub> [ <i>I</i> > 2 $\sigma$ ( <i>I</i> )] | 0.1135                                           | 0.0654                                                                               | 0.0608                                                                 |
| <i>wR</i> <sub>2</sub> (all data)                           | 0.2151                                           | 0.1942                                                                               | 0.1594                                                                 |
| Temperature [K]                                             | 93(2)                                            | 93(2)                                                                                | 93(2)                                                                  |



### **Electrochemical Analysis**

Cyclic voltammograms and differential pulse voltammograms of **1H**, **7**, **8a**, **8b**, **8c**, and **8d** were recorded using an ALS electrochemical analyzer 612C. Measurements were performed in freshly distilled  $\text{CH}_2\text{Cl}_2$  with tetrabutylammonium hexafluorophosphate as the electrolyte. A three-electrode system was used. The system consisted of a platinum working electrode, a platinum wire, and  $\text{Ag}/\text{AgNO}_3$  as the reference electrode. The scan rate was  $100 \text{ mVs}^{-1}$ . The measurement was performed under nitrogen atmosphere. All potentials are referenced to the potential of ferrocene/ferrocenium cation couple.

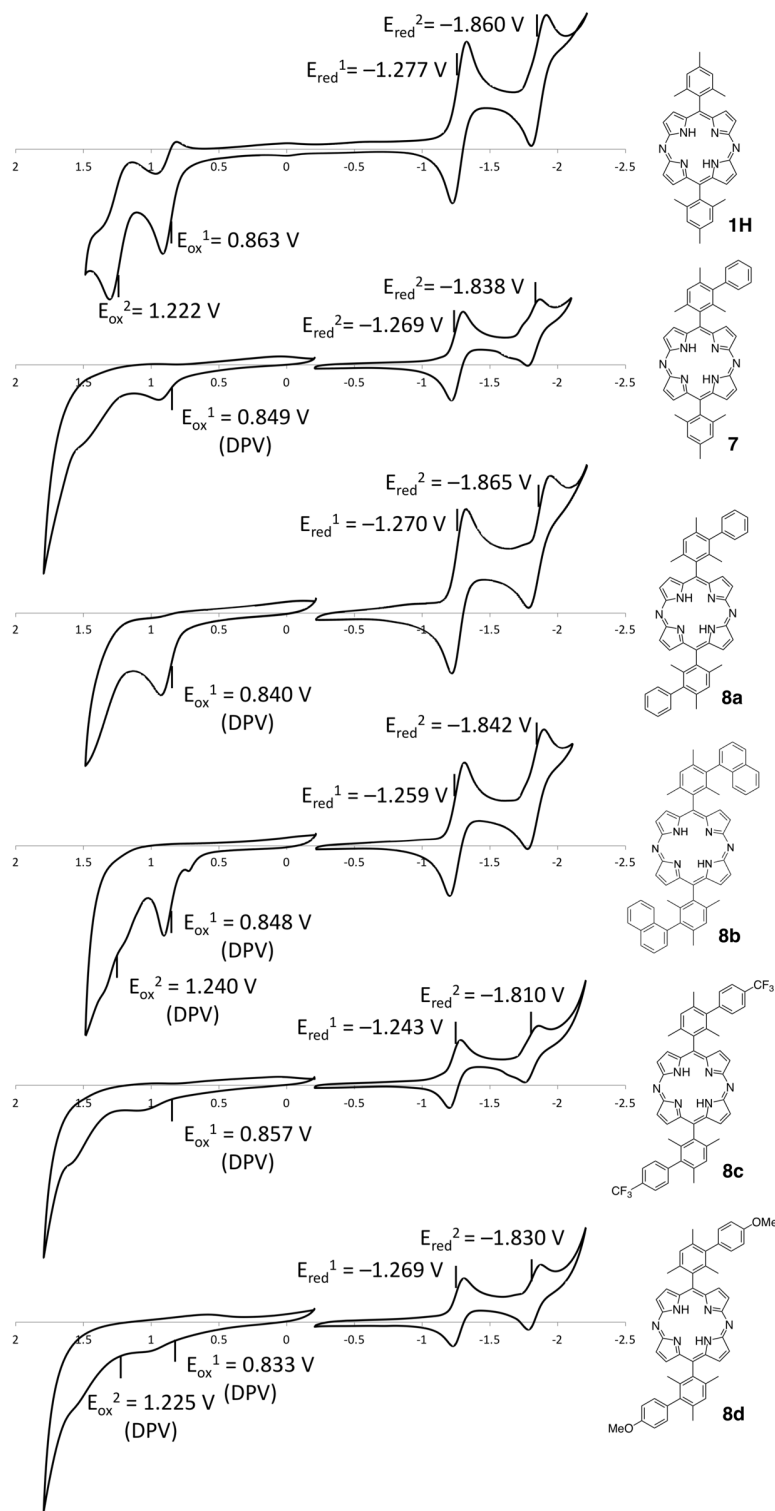

**Figure S46.** Cyclic voltammograms of **1H**, **7**, **8a**, **8b**, **8c**, and **8d** in  $CH_2Cl_2$ .

## Theoretical Calculations

All calculations were performed using the Gaussian 09 program.<sup>2</sup> All the structures were fully optimized without any symmetry restriction at the Becke's three-parameter hybrid exchange functional and the Lee–Yang–Parr correlation functional (B3LYP)<sup>3</sup> and a basis set consisting of SDD<sup>4</sup> for Ni and 6-31G(d) for the rest.

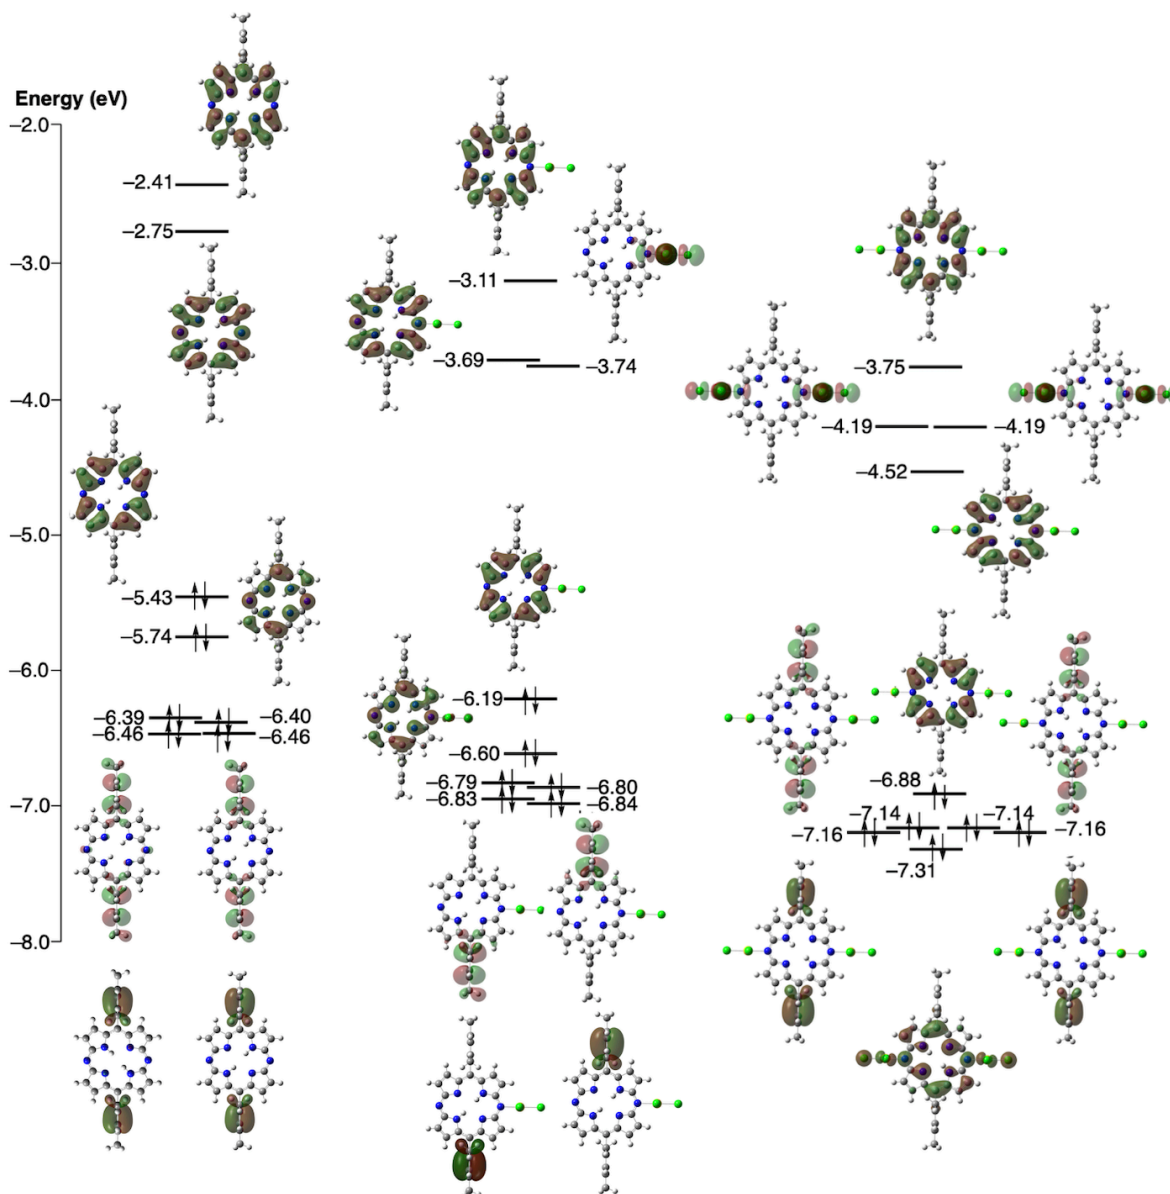

**Figure S47.** Molecular orbital diagrams of **1**, **9**, and **10** calculated the B3LYP/6-31G(d)+SDD level.

## References

- 1) Matano, Y.; Shibano, T.; Nakano, H.; Kimura, Y.; Imahori, H. *Inorg. Chem.* **2012**, *51*, 12879–12890.
- 2) Gaussian 09, Revision D.01, Frisch, M. J.; Trucks, G. W.; Schlegel, H. B.; Scuseria, G. E.; Robb, M. A.; Cheeseman, J. R.; Scalmani, G.; Barone, V.; Mennucci, B.; Petersson, G. A.; Nakatsuji, H.; Caricato, M.; Li, X.; Hratchian, H. P.; Izmaylov, A. F.; Bloino, J.; Zheng, G.; Sonnenberg, J. L.; Hada, M.; Ehara, M.; Toyota, K.; Fukuda, R.; Hasegawa, J.; Ishida, M.; Nakajima, T.; Honda, Y.; Kitao, O.; Nakai, H.; Vreven, T.; Montgomery, Jr., J. A.; Peralta, J. E.; Ogliaro, F.; Bearpark, M.; Heyd, J. J.; Brothers, E.; Kudin, K. N.; Staroverov, V. N.; Kobayashi, R.; Normand, J.; Raghavachari, K.; Rendell, A.; Burant, J. C.; Iyengar, S. S.; Tomasi, J.; Cossi, M.; Rega, N.; Millam, J. M.; Klene, M.; Knox, J. E.; Cross, J. B.; Bakken, V.; Adamo, C.; Jaramillo, J.; Gomperts, R.; Stratmann, R. E.; Yazyev, O.; Austin, A. J.; Cammi, R.; Pomelli, C.; Ochterski, J. W.; Martin, R. L.; Morokuma, K.; Zakrzewski, V. G.; Voth, G. A.; Salvador, P.; Dannenberg, J. J.; Dapprich, S.; Daniels, A. D.; Farkas, Ö.; Foresman, J. B.; Ortiz, J. V.; Cioslowski, J.; Fox, D. J. Gaussian, Inc., Wallingford CT, 2009.
- 3) (a) Becke, A. D. *Phys. Rev. A* **1988**, *38*, 3098. (b) Lee, C.; Yang, W.; Parr, R. G. *Phys. Rev. B* **1988**, *37*, 785.
- 4) Dolg, M.; Wedig, U.; Stoll, H.; Preuss, H. *J. Chem. Phys.* **1987**, *86*, 866.
